# Supplementary material for: Peculiarities of Functional Connectivity—including Cross-Modal Patterns—in Professional Karate Athletes: Correlations with Cognitive and Motor Performances
Source: Hindawi journal article supplement (doi:10.1155/2019/6807978), 2019-06-26
Supplement: f1 [file 6807978.f1.zip]

Archive with 11 entries (11 files):
- Berti et al_Suppl Mat.docx
- S1.png
- S2.png
- S3.png
- S4.png
- S5.png
- Table S1.xlsx
- Table S2.xlsx
- Table S3.xlsx
- Table S4.xlsx
- Video 1_Ergomak.mp4
