# Supplementary material for: Peculiarities of Functional Connectivity—including Cross-Modal Patterns—in Professional Karate Athletes: Correlations with Cognitive and Motor Performances
Source: Hindawi journal article supplement (doi:10.1155/2019/6807978), 2019-06-26
Supplement: f1 [file 6807978.f1.zip › Berti et al_Suppl Mat.docx]

Supplementary Materials for:

***Peculiarities of functional connectivity –including cross-modal patterns- in professional Karate athletes: correlations with cognitive and motor performances***

Beatrice Berti1,2†, Davide Momi1,3†, Giulia Sprugnoli1, Francesco Neri1, Marco Bonifazi2, Alessandro Rossi1,2,6, Maria Michela Muscettola2, Roberto Benocci4, Emiliano Santarnecchi1,2,3,5 and Simone Rossi1,2,6

1 Siena Brain Investigation & Neuromodulation Lab. (Si-Bin Lab), Department of Medicine, Surgery and Neuroscience, Neurology and Clinical Neurophysiology Section, University of Siena, Italy

2 Department of Medicine, Surgery and Neuroscience, Neurology and Clinical Neurophysiology Section, University of Siena, Italy

3 Berenson-Allen Center for Non-Invasive Brain Stimulation, Beth Israel Medical Center, Harvard Medical School, Boston, MA, USA

4 ASD Shinan Karate Kai of Siena, Siena, Italy

5 Siena Robotics and Systems Lab (SIRS-Lab), Engineering and Mathematics Department, University of Siena, Italy

6 Unit of Neurology and Clinical Neurophysiology, Department of Medicine, Surgery and Neuroscience, University of Siena, Siena, Italy

† these authors contributed equally

1. **SUPPLEMENTARY INFORMATION**
   1. *The discipline of Karate*
   2. *Legend to the Video*
2. **SUPPLEMENTARY MATERIAL AND METHODS**
   1. Cognitive assessment
   2. Cognitive tasks battery
      1. *Flexibility*
      2. *Inhibition*
      3. *Working memory*
      4. *Attention*
      5. *Mental rotation*
      6. *Motor learning*
      7. *Premorbid intelligence quotient*
      8. *Cognitive judgement*
      9. *Handless Questionnaire*
   3. Motor performance
   4. Correlation between cognitive profile and motor performance
3. **SUPPLEMENTARY RESULTS**
   1. Cognitive profile correlates with motor abilities
4. **SUPPLEMENTARY FIGURES**
5. **SUPPLEMENTARY TABLES**
6. **SUPPLEMENTARY INFORMATION**
   1. **The discipline of Karate**

Professional Karate is an open skill discipline requiring high-level performance based on explosive and ballistic techniques, and it is a good example of a competitive sport with high temporal, attentional and spatial constraints: it demands rapid RTs, maximal speed, explosive strength power and speed in response to a stimulus. This discipline is divided into *kata* and *kumite*. *Kata* is a set form in pre-established sequences of offensive and defensive techniques and movements. According to the competition rules of the World Karate Federation (WKF, 2017), *kata* performance judgement is essentially based on assessing the following criteria: technique, rhythm, timing/synchronization, power, expressiveness of movement and *kime* that is a short isometric muscle contraction performed when a technique is finished, supported by an exhalation [1]. *Kumite*, in contrast, is a real match/combat between two competitors under strict rules; they are free to move, kick and punch in defensive and offensive manners. The criteria for *kumite* performance judgement include: good form (is said to have characteristics conferring probable effectiveness within the framework of traditional karate concepts*)*, fair play (non malicious attitude), vigorous application of kicks and punches, awareness (*zanshin*), good timing and adequate distance [1]. Vigorous application defines “the power and speed of the technique and the palpable will for it to succeed” [1]. Good timing means delivering a technique when it will have the greatest potential effect, i.e. the ability to coincide movements in relation to external factor [2]. If two contestants hit each other at the exact same time, the scoring criterion of “good timing” has not been met and the correct judgement is to not award a point; timing, reactivity, power and speed predict the optimal karate performance [1]. *Kiai* is a japanese term used in martial arts for the short yell or shout uttered when performing an attacking move both in *kata* and *kumite* performances [3]. It expresses the efficacy of the technique, because is the moment when karateka expresses maximum energy, vigorous application and good timing [1, 3].

**1.2 Legend to the Video**

The “Ergo-Mak” integrated system (Shinan Institute, Siena, Italy; patent N° SI2004U000001) was employed in the present study to record kinematic, dynamic and psycho-ergonomic movement parameter of the athletic feat. In the video, three different feats are shown, each one accompanied by the typical “kiai”.

1. **SUPPLEMENTARY MATERIAL AND METHODS**

**2.1 Cognitive Assessment**

A set of cognitive tasks were used during the baseline assessment visit (Figure 1), spanning from perceptual to high order cognition skills. The entire set consisted of thirteen tasks covering cognitive functions such as attention, abstract reasoning, inhibition, verbal and visuospatial working-memory, switching and insight. The assessment required 120 minutes to complete and was performed on a Windows laptop PC (Microsoft) equipped with E-prime 2.0 software (Psychology Software Tools Inc.; [www.pstnet.com](http://www.pstnet.com)).

**2.2 Cognitive battery**

***2.1.1 Flexibility.*** Global-Local Features Task [4] was administrated in order to evaluate selective attention, inhibition and switching skills. A compound stimuli representing letters was shown which required participants to pay attention alternatively to Local or Global stimulus characteristics.

Switching was evaluated by means of the Preparing to Overcome Prepotency (POP) Task [5], where participants were asked to select the context-appropriate response. They were administrated either a green or red square followed by either a right or left arrow. If the arrow followed the green square, subjects had to respond by clicking the same arrow key (left arrow, left arrow key). On the other hand, when the arrow followed the red prompt, the subject was required to press the opposite arrow key (left arrow, right arrow key), a scenario that requires more cognitive control.

***2.1.2 Inhibition.*** A Letter NoGo [6] task was used in which participants were asked to press a button when one item type appeared (Go" trials) and withhold the overbearing response when another item type appeared ("No-Go" trials).

***2.2.3 Working memory.*** Change Localization Task [7] was administrated where subjects were asked to detect which one of four squares changed colour between the first and second presentation. The delay between the first and second presentation increased during the proof in order to create more challenging scenarios.

***2.2.4 Attention.*** A Visual search task [8] was used where participants were asked to search for a target (letter “L”) among distractors (“T”), thus providing an index of selective attentional and perceptual skills. Participants had to press the corresponding key on the laptop keyboard, indicating the quadrant where the “L” appeared.

The ability to allocate attention on two consecutive stimuli was evaluated by means of the Adaptive Attentional Blink [9] task. A rapid stream of black letters were flashed on the centre of the screen where a white letter (B, G or S) was randomly shown at one time of this stream (first target). After the first target, a X-letter (second target) could be presented or not (50% of the trials). Participants were asked to detect the identity of the first target, pressing the corresponding letter, and after to determinate whether an X-letter was presented or not. Full of meaning was considered the X-detection judgement, which represents the cost of the attentional switch between the first and the second target.

An Enumeration task [10] was administrated in order to measure the number of items that can be promptly handled. Participants were asked to report the number of flashed random white squares (between 3 and 12) as quickly and as accurately as possible. Enumeration task consisted of two blocks, varying in the extent of the visual field over which the white squares could be presented: shrink and full condition.

The ability to suppress responses that are inappropriate in a particular context was measured using an adaptive Flanker Task version [10]. A structure composed by six rings was flashed (16ms duration) in the centre of the screen where different kind of shapes were presented inside and outside the rings. Participants were asked to decide (forced choice) whether a square or a triangle was presented within one of six rings (target). The distractors could be either other shapes presented within the six rings (incompatible distractors), or squares and triangles presented outside the six rings (compatible distractors).

The useful field of view was given to measure the ability of the attentional system to locate a target among distractors. A spoked structure composed of 24 squares (distractors) and 1 circle (target), was flashed at the centre of a computer screen. Participants were requested to determine as quickly and as accurately as possible, in which of the eight possible directions the circle had appeared within the spoked structure. Target stimulus was presented at different eccentricities, in order to evaluate the spatial distribution of visual attention.

***2.2.5 Mental rotation.*** The ability to rotate mental representations of two-dimensional objects was evaluated through a mental rotation task [11]. Either a “R” letter or a “2” number were shown, following which subjects saw an arrow pointing in each different direction. Finally, a “R” letter or “2” number appeared mirror-reversed or in upright position.

Participants were asked to indicate whether the “R” or “2” was facing the correct direction indicated by the arrow or was mirror-reversed.

***2.2.6 Motor learning.*** Serial Reaction Time Task [12] was administrated to capture a visuomotor learning measure. In this task, a visual cue could be presented at four different positions, configured horizontally at the centre of a computer screen. Participants were asked to press the appropriate response button corresponding to the position of the visual cue. The position of the visual cue could either follow a repeating sequence or be random. When the task was finished, a questionnaire was fulfilled where participants were asked whether they recognized a repeated sequence. Subjects were completely unware about the questionnaire before the task.

***2.2.7 Premorbid intelligence quotient.*** At the end of the pc-based cognitive battery, a premorbid intellectual abilities estimation were acquired by means of a verbal “culture-unfair” Italian task: Test d’Intelligenza Breve (TIB)[13, 14]. Participants were asked to read a total amount of 54 words focusing on pronunciation and acceptance. An estimated IQ score was calculated based on the number of mistakes.

***2.2.8 Cognitive judgement.*** A estimation of frontal lobe functioning was provided by the Cognitive Estimation Task [15], a paper-and-pencil tests considered representative of executive functioning and deductive reasoning measures. A reasonable cognitive estimate to 21 questions relating to length, weight, area, speed, and number were provided. For this purpose participants had to identify and select the appropriate context, retrieve and manipulate previously learned knowledge from that context, check the appropriateness of their first estimation, and smooth if necessary to provide a better response.

2.2.9 Handless Questionnaire. An evaluation of lateral preference was carried out by means of the Handless Questionnaire [16]. Specifically, 13 items describing different motor activities were administered, where participants were asked to mark a "+" in the appropriate column (left or right) if the described activity was preferentially carried out using one hand. A "+" in both columns indicates real indifference about which hand to use. On the basis of the answers given, a laterality quotient varying from -100 (extreme left-handedness) to +100 (extreme right-handedness) was estimated for each subject.

- 1. **Magnetic resonance imaging (MRI) data acquisition**

Imaging was performed on a Philips INTERA 1.5 T MRI scanner. A T1-weighted anatomical image and 2 rs-fMRI sessions during the rest condition(TR/TE 2500/40ms, 200 scans, 23 slices, total scanning length 8 min) were acquired for each participants during the first visit. Subjects were asked to remain as still as possible and awake in the scanner with their eyes open.

- 1. **Neuroimaging data preprocessing**

SPM8 software (Statistical Parametric Mapping; http://www.fil.ion.ucl.ac.uk/spm/) was used for the preprocessing steps. The first three volumes of functional images were discarded for each subject to allow for steady-state magnetization. EPI images were slice-time corrected using the interleaved descending acquisition criteria, and realigned and re-sliced to correct for head motion using a mean functional volume derived from the overall fMRI scans. A matrix for each subject that had been used during the statistical analysis to completely remove the effects of these timepoints. Subject whose head motion exceeded 1.0 mm or rotation exceeded 1.0◦ during scanning were excluded. CONN-fMRI functional connectivity toolbox v15g [17](http://www.nitrc.org/projects/conn) was used to carry out resting state analyses.

Several preprocessing steps were implemented in order to reduce the noise, increasing the reliability of connectivity measures. CompCor confound removal method was used to removed confound signals associated with segmented white matter (WM) and cerebrospinal fluid (CSF). In a first-level analysis, CompCor components and first-order derivatives of motion were entered as confounds and regressed from the BOLD signal [17–19]. A band-pass filtering to the frequency window of interest 0.01Hz<f<0.1Hz was performed. A hyperbolic tangent squashing function was implemented for temporal despiking of BOLD timeseries.

First-level analysis was performed to explore the functional connectivity of different sources separately for each subject. ROI-to-ROI and Seed-to-voxel functional connectivity maps were defined for each participant to identify potential differences between karatekas and controls.

In order to carry out these analyses, the Harvard-Oxford (cortical and subcortical) and the Shirer network-based (Shirer et al. (http://findlab.stanford.edu/functional_ROIs, Stanford University, Palo Alto, CA) atlases were used for the cortical parcellation.

Individual ROI-to-ROI and Seed-to-voxel maps were entered in the second-level-analysis step, to define and explore within- and between- subjects contrasts of interest, where covariates defined groups regressors (karatekas and controls).

In the ROI-to-ROI analyses, the BOLD time-series signals were extracted for each atlases’ ROIs and correlated with the BOLD time-series signal of every other ROIs belonging to the same atlas. In this way, a correlation pattern showing the connectivity between each region was obtained for both atlases. Mean ROIs connectivity (mean of all pair-wise correlations within the two atlases) were computed and compared between the two groups.

Initial analyses aimed to establish whether connectivity in karateka differed from controls’ pattern of connectivity. Age and gender were entered as second-level covariates of no interest in the analysis.

Following tasks execution, cognitive scores were entered as second-level covariate of interest in order to verify whether the functional connectivity pattern could explain significant differences in the cognitive performance between karateka and controls.

Then, a Principal component analysis (PCA)[20] was employed to convert the set of motor performance measures into a set of 3 uncorrelated variables (strength, power and execution). The e most representative measures for each principal component were entered as second-level covariates to evaluate whether the functional connectivity could account for a better or worse motor performance as avaluated by the Ergo-Mak integrated system.

Finally, because ROI-to-ROI analyses have different sensitivities, a seed-to-voxel was used to examine whether the significant differences in the ROI-to-ROI analysis survived to the whole brain voxel-wise statistics.

A threshold of 0.05 was used both for ROI-to-ROI and Seed-to-voxel analyses, and false positive controls were verified by means of uncorrected or false discovery rate (FDR)-corrected p-values (p<0.05 FDR corrected, two sided).

- 1. ***Motor performance***

Ergo Mak integrated system recorded the following dynamic and kinematic data of each gyku tsuki:

- Simple Reaction Time (s RT): measured in milliseconds as the time between the appearance of the visual stimulus (red rhombus) and the time when the hand started to move.
- Time of movement (TM): measured in millisecond and followed s RT. It was the time between when the hand started to move and when it reached the target.
- Total Time (TT): the sum of s RT and TM.
- Contact speed of the hand: calculated as the speed at any given instant in time (Instantaneous Speed) found by the following equation:

*Instantaneous Speed (IS)=*

(1)

Ergo Mak allowed the measure of contact speed of the hand through the reading of the position of the hand (measured in meters) during the punch before it reached the target with a frequency of 5000 Hertz.

- Average Speed of the hand: the average of all instantaneous speeds.
- Force: measured in Newton (N). The second law of Newton states that the acceleration of an object depends directly upon the net force, called Inertia force (FI), acting upon the object, and inversely upon the mass of the object. As the force acting upon an object is increased, the acceleration of the object is increased. As the mass of an object is increased, the acceleration of the object is decreased. This verbal statement can be expressed in equation form as follows:

*FI = mass (m) * acceleration (a)*

(2)

By substituting standard metric units for force, mass, and acceleration into the above equation, 1 Newton is defined as the amount of force required to produce an acceleration of a 1 m * s-2 of a mass equal to 1 kg.

During a collision, impacting and impacted bodies have propriety of mass elasticity and viscosity. When a region of the body is impacted, it reacts whit the sum of three forces:

I) Inertia Force (2)

II) Spring force (FS) stated by Hook’s law:

*FS= -k * Displacement (s)*

(3)

Where *k* is the elastic constant.

III) Viscose force (Fv)

*Fv= β * speed (v)* (4)

β is the viscose constant of friction.

Ergo Mak measured Total force (FTOT) of the impact resulting from the sum of these three forces (2, 3, 4 equations).

Makiwara was manufactured whit a good approximation, regarding mass elastic and viscose constant, as *chudan* *region* (the upper abdomen region with the corresponding muscle in a contraction state) and its specific units were:

- m = 1,01 kg
- K = 13000 N/m
- *β = 10 kg s2*

Ergo Mak measured total mass (mtot) transmitted during the impact expressed in equation form as follows:

*mtot =*

(5)

ma is the mass of the *Makiwara* that is impacted and meq is the Equivalent Mass (of *gyaku tsuki*) transmitted to *Makiwara* at the impact.

- Kinetic energy: the energy of an object that has motion. When the hand of karateka impact on *Makiwara*, the mass of *Makiwara* change in speed and kinetic energy according to the following formula:

*Kinetic energy (K) = ½ mv2*

(6)

The standard metric unit of measurement for kinetic energy is the Joule.

- Work: any object that possesses kinetic is able to do work. The unit of work is the joule (J), which is defined as the work expended by a force of one newton through a displacement of one metre according to the following formula:

*Work (W) = Ftot * S*

(7)

F is the Force and s the displacement. Ergo Mak system calculate work as the average force of a punch for the displacement of Makiwara.

- Power: the rate at which work is done, calculated as show below:

*Power (P) = W/t or P = Ftot * S*

(8)

The standard metric unit of power is the Watt (W).

**2.4 Correlation between cognitive profile and motor performance**

Given the effort in measuring both cognitive profile and motor skills, we hypothesized that such sport performance might be related to particular cognitive abilities in karate group. A correlation analysis was implemented using Statistical Package for the Social Sciences (SPSS) Version 20 [21]. The critical p-value was adjusted using Bonferroni correction for multiple comparisons (p =.001).

1. **SUPPLEMENTARY RESULTS**
   1. Cognitive profile correlates with motor abilities

As shown in Figure S1,the analysis identified a significant positive correlation (R2= 65%;)between Useful Field of view (UFOV) accuracies and Full Speed Hand (m/s).

1. **SUPPLEMENTARY FIGURES**

**[insert suppl fig S1 around here]**

Figure S1. Positive correlation (R² = 65%) between Useful Field of View accuracies and Full Speed Hand (m/s).

**[insert suppl fig S2 around here]**

Figure S2. Same organization as Figure 4 (main text), but results are shown as unthresholded maps

**[insert suppl fig S3 around here]**

Figure S3. Same organization as Figure 5 (main text), but results are shown as unthresholded maps

**[insert suppl fig S4 around here]**

Figure S4. Same organization as Figure 6 (main text), but results are shown as unthresholded maps

**[insert suppl fig S5 around here]**

Figure S5. Same organization as Figure 7 (main text), but results are shown as unthresholded maps

**5. SUPPLEMENTARY TABLES**

**
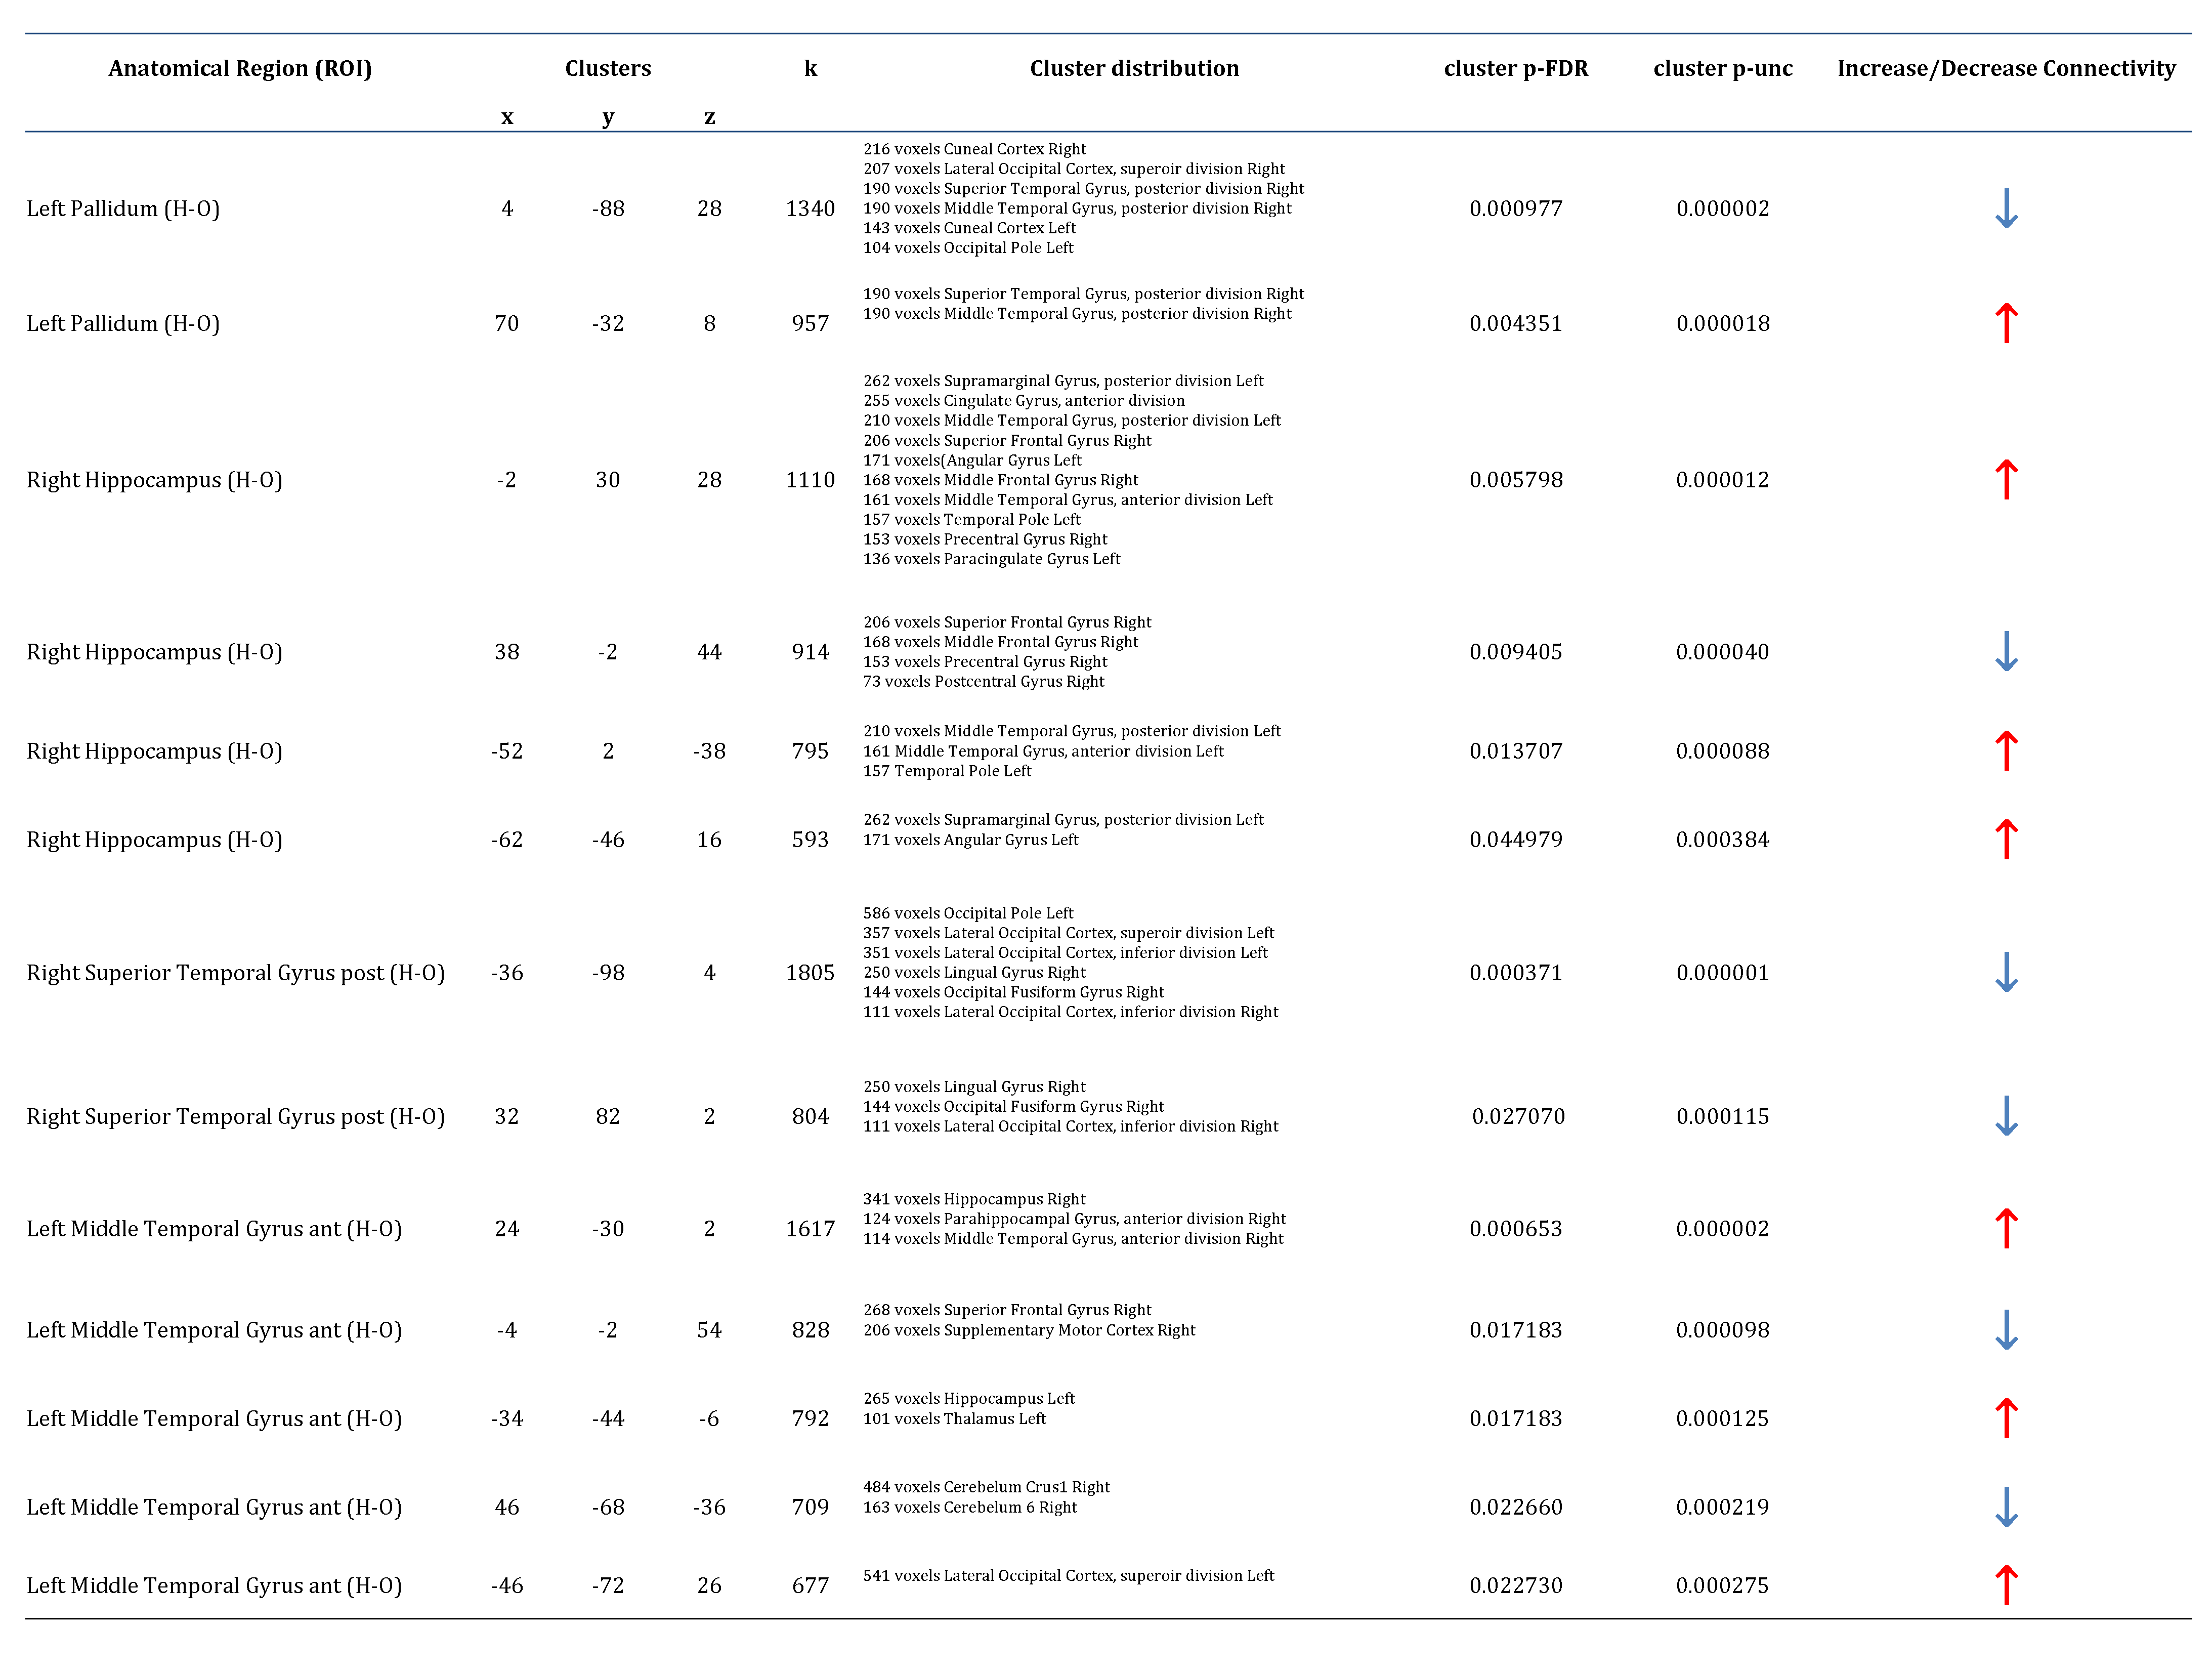
Table S1.** Seed-to-Voxel-based analysis of significant clusters that showed a significant increase (red arrow) or decrease (blue arrow) correlation in the karate group.


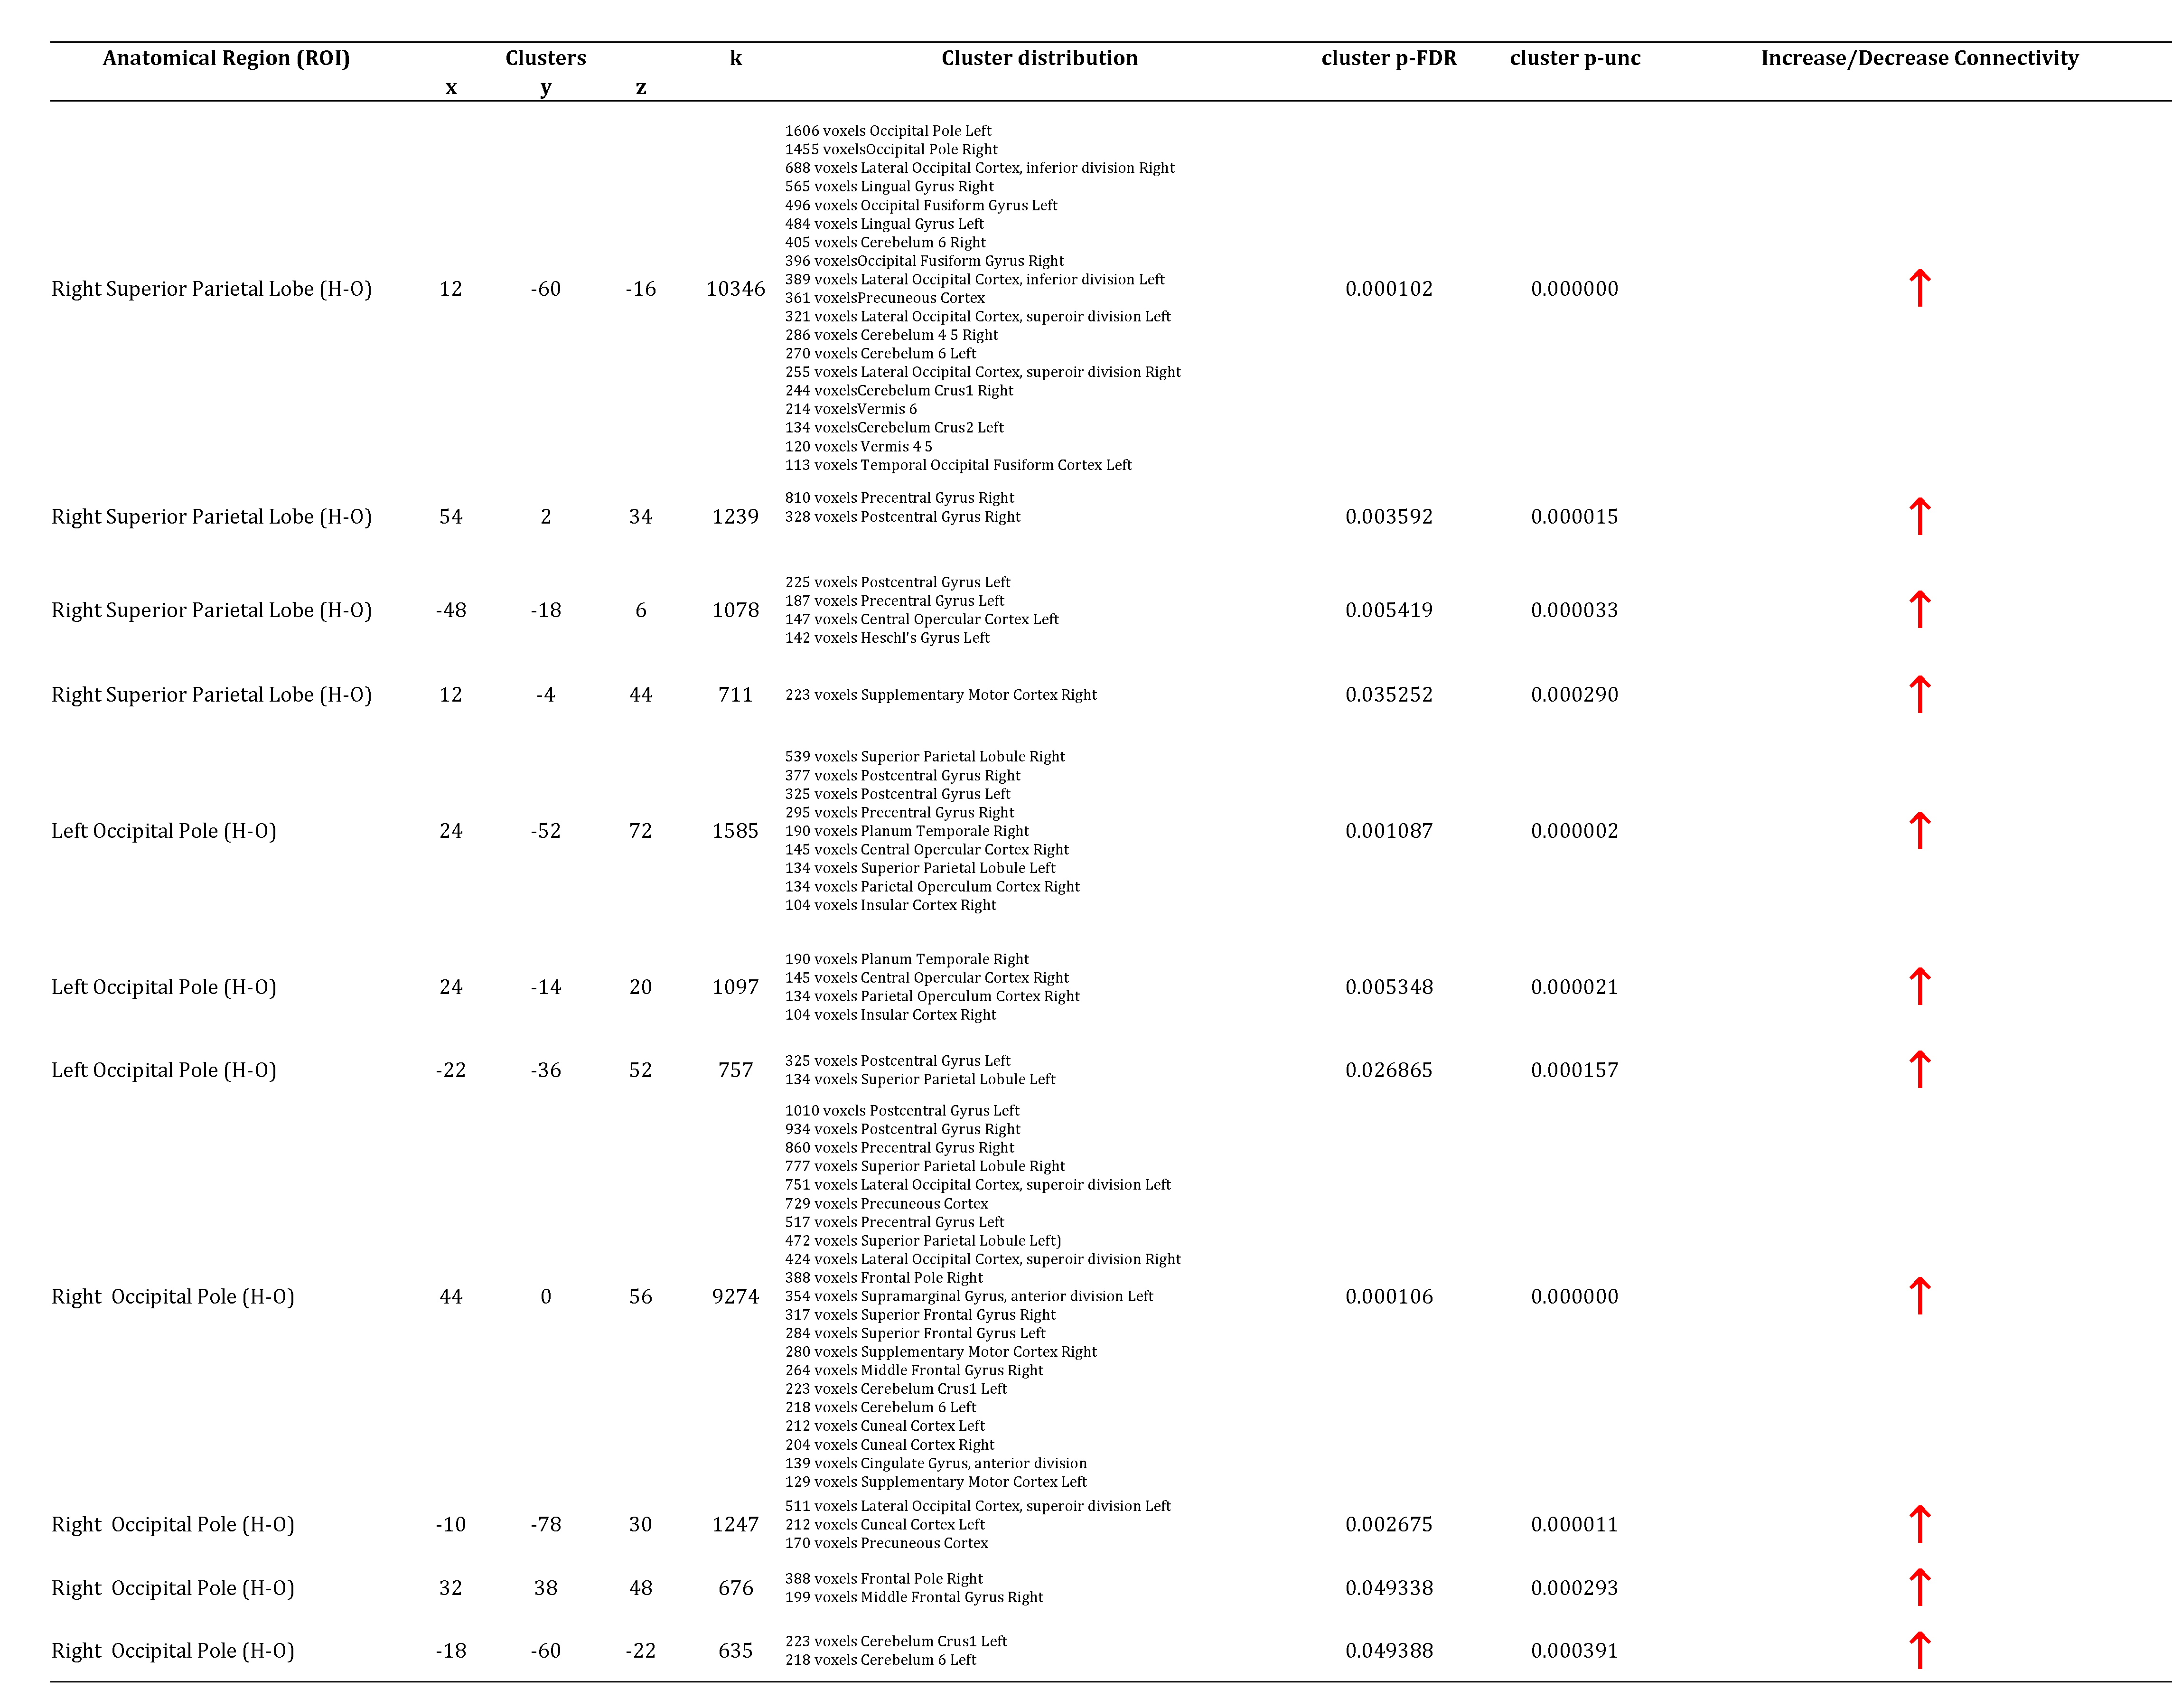


Table S2. Seed-to-Voxel-based analysis of significant clusters that showed a significant increase (red arrow) or decrease (blue arrow) correlation for Visual Search Reaction Times performance.


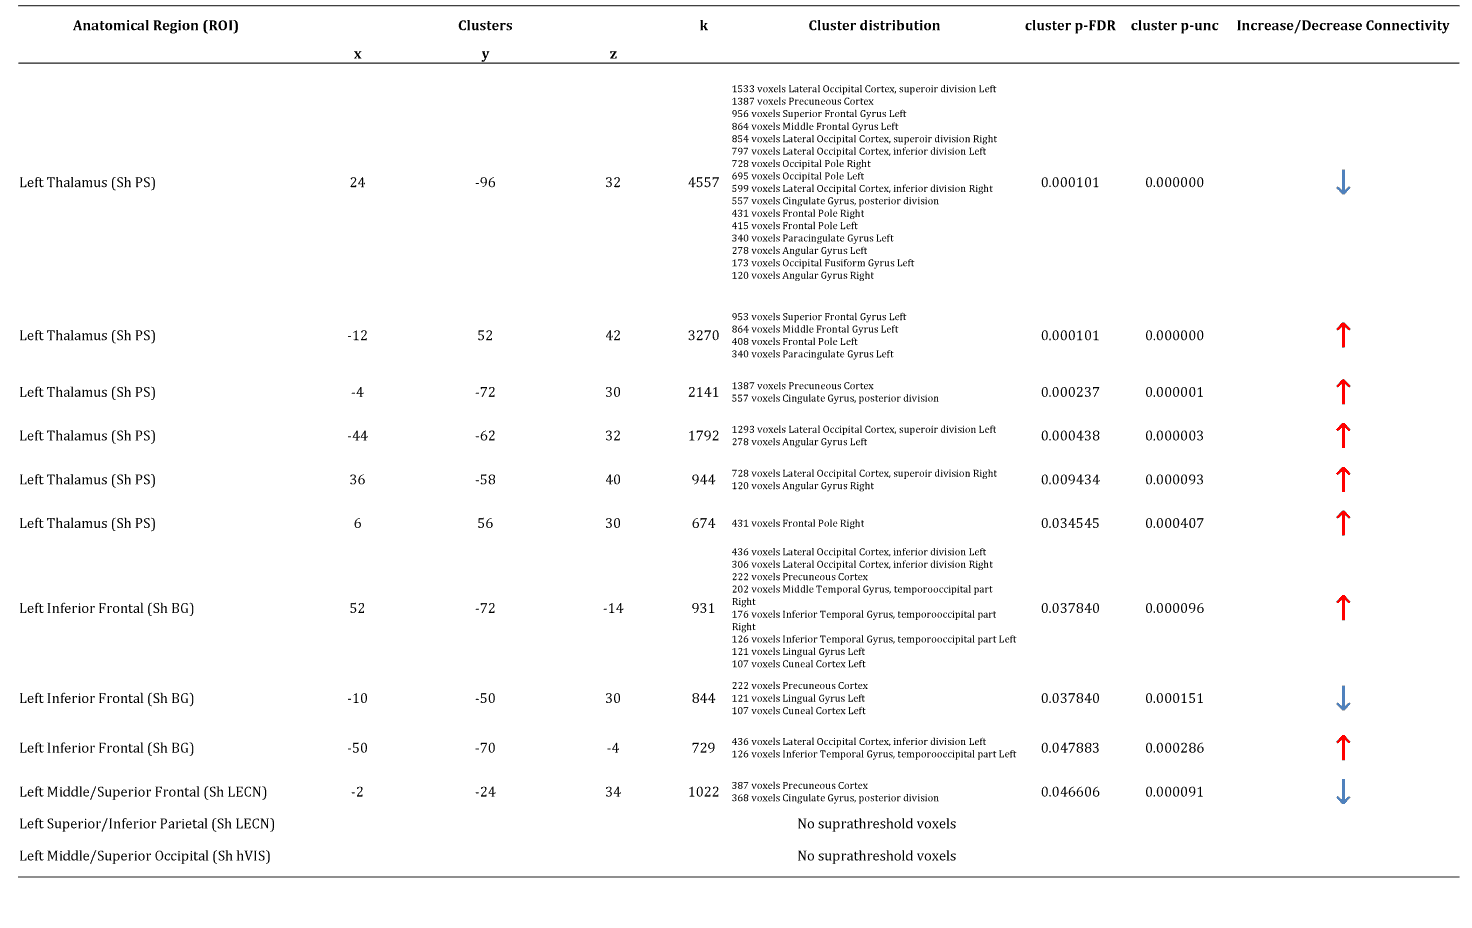
Table S3. Seed-to-Voxel-based analysis of significant clusters that showed a significant increase (red arrow) or decrease (blue arrow) correlation for the most representative measure of the Power component.


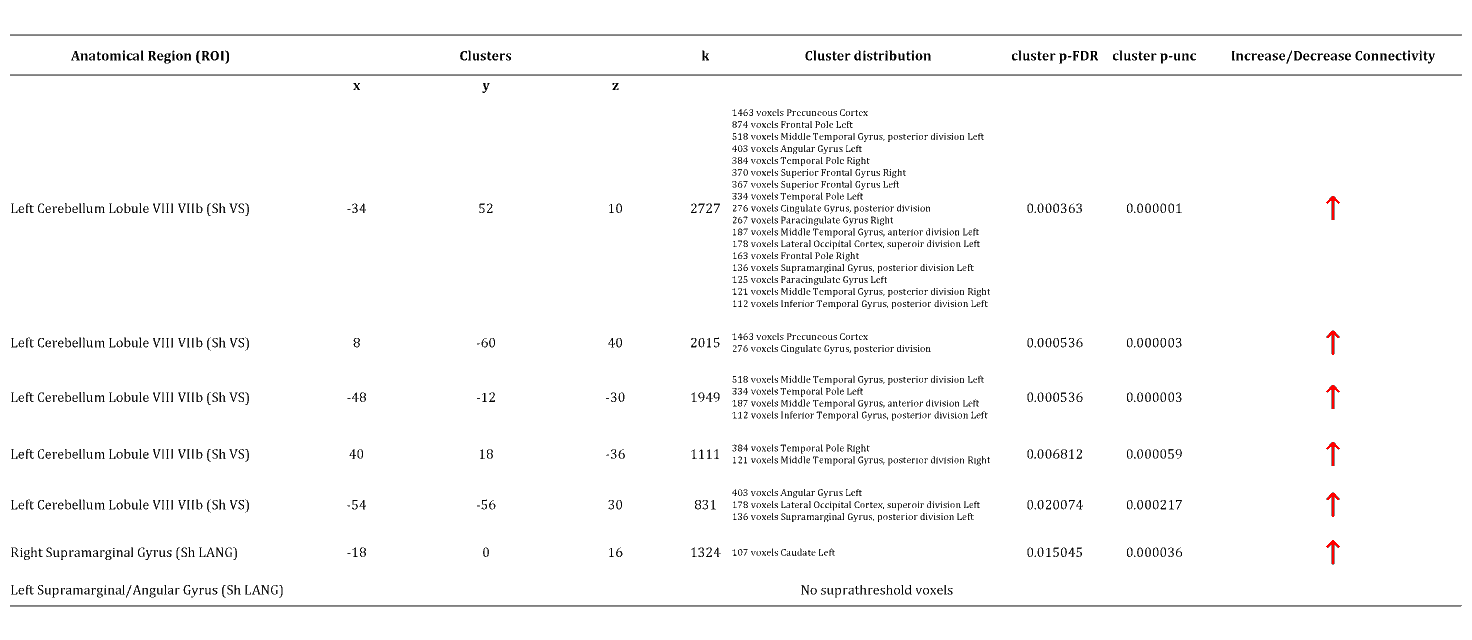
**Table S4.** Seed-to-Voxel-based analysis of significant clusters that showed a significant increase (red arrow) or decrease (blue arrow) correlation for the most representative measure of Speed component

**SUPPLEMENTARY REFERENCES**

[1] World Karate Federation, *Kata and Kumite competition rules*., 2018.

[2] E.B.-O. Cohen, “Timing in Karate and the Body in Its Own Right.,” *Social Analysis*. vol. 51, no. 3, pp. 1–22, 2007.

[3] M. Daimaruya, H. Fujiki, and H. Anbarita, “Consideration of the Power in Karate-doh from the Viewpoint of Impact Engineering.,” p. 12, 2011.

[4] D. Navon, “Forest before trees: The precedence of global features in visual perception.,” *Cognitive Psychology*. vol. 9, no. 3, pp. 353–383, 1977.

[5] C. Rosano, H. Aizenstein, J. Cochran, et al., “Functional neuroimaging indicators of successful executive control in the oldest old.,” *NeuroImage*. vol. 28, no. 4, pp. 881–889, 2005.

[6] L.B. Thorell, S. Lindqvist, S. Bergman Nutley, G. Bohlin, and T. Klingberg, “Training and transfer effects of executive functions in preschool children.,” *Developmental Science*. vol. 12, no. 1, pp. 106–113, 2009.

[7] S.J. Luck and E.K. Vogel, “The capacity of visual working memory for features and conjunctions.,” *Nature*. vol. 390, no. 6657, pp. 279–281, 1997.

[8] A.M. Treisman and G. Gelade, “A feature-integration theory of attention.,” *Cognitive Psychology*. vol. 12, no. 1, pp. 97–136, 1980.

[9] C.S. Green and D. Bavelier, “Action video game modifies visual selective attention.,” *Nature*. vol. 423, no. 0028-0836 (Print), pp. 534–537, 2003.

[10] C.S. Green and D. Bavelier, “Effect of action video games on the spatial distribution of visuospatial attention.,” *J.Exp.Psychol.Hum.Percept.Perform.* vol. 32, no. 0096-1523 (Print), pp. 1465–1478, 2006.

[11] R.N. Shepard and J. Metzler, “Mental rotation of three-dimensional objects.,” *Science (New York, N.Y.)*. vol. 171, no. 3972, pp. 701–703, 1971.

[12] E.M. Robertson, “The Serial Reaction Time Task: Implicit Motor Skill Learning?,” *Journal of Neuroscience*. vol. 27, no. 38, pp. 10073–10075, 2007.

[13] H. Nelson, “National Adult Reading Test (NART) test manual (Part 1.,” p. 1984.

[14] G. Sartori, L. Colombo, G. Vallar, M.L. Rusconi, and A. Pinarello, “Test di intelligenza breve (T.I.B.),” src/test/tib/index.xml.

[15] S. Della Sala, S.E. MacPherson, L.H. Phillips, L. Sacco, and H. Spinnler, “How many camels are there in Italy? Cognitive estimates standardised on the Italian population.,” *Neurological Sciences: Official Journal of the Italian Neurological Society and of the Italian Society of Clinical Neurophysiology*. vol. 24, no. 1, pp. 10–15, 2003.

[16] D. Salmaso and A.M. Longoni, “Hand preference in an Italian sample.,” *Perceptual and Motor Skills*. vol. 57, no. 3 Pt 2, pp. 1039–1042, 1983.

[17] S. Whitfield-Gabrieli and A. Nieto-Castanon, “Conn: a functional connectivity toolbox for correlated and anticorrelated brain networks.,” *Brain Connectivity*. vol. 2, no. 3, pp. 125–141, 2012.

[18] Y. Behzadi, K. Restom, J. Liau, and T.T. Liu, “A Component Based Noise Correction Method (CompCor) for BOLD and Perfusion Based fMRI.,” *NeuroImage*. vol. 37, no. 1, pp. 90–101, 2007.

[19] W.R. Shirer, S. Ryali, E. Rykhlevskaia, V. Menon, and M.D. Greicius, “Decoding subject-driven cognitive states with whole-brain connectivity patterns.,” *Cerebral Cortex (New York, N.Y.: 1991)*. vol. 22, no. 1, pp. 158–165, 2012.

[20] S. Wold, K. Esbensen, and P. Geladi, “Principal component analysis.,” *Chemometrics and Intelligent Laboratory Systems*. vol. 2, no. 1, pp. 37–52, 1987.

[21] IBM Corp, *BM SPSS Statistics for Windows, Version 20.0. Armonk, NY: IBM Corp*., 2011.

World Karate Federation (WKF) (2017) Kata and kumite competition rules
