# Supplementary material for: Peculiarities of Functional Connectivity—including Cross-Modal Patterns—in Professional Karate Athletes: Correlations with Cognitive and Motor Performances
Source: Hindawi journal article supplement (doi:10.1155/2019/6807978), 2019-06-26
Supplement: f1 [file 6807978.f1.zip › Table S1.xlsx]

## Sheet: Sheet1
Anatomical Region (ROI)	Clusters			k	Cluster distribution	cluster p-FDR	cluster p-unc	Increase/Decrease Connectivity
	x	y	z
Left Pallidum (H-O)	4	-88	28	1340	216 voxels Cuneal Cortex Right	0.000977	0.000002	↓
					207 voxels Lateral Occipital Cortex, superoir division Right
					190 voxels Superior Temporal Gyrus, posterior division Right
					190 voxels Middle Temporal Gyrus, posterior division Right
					143 voxels Cuneal Cortex Left
					104 voxels Occipital Pole Left
Left Pallidum (H-O)	70	-32	8	957	190 voxels Superior Temporal Gyrus, posterior division Right	0.004351	0.000018	↑
					190 voxels Middle Temporal Gyrus, posterior division Right
Right Hippocampus (H-O)	-2	30	28	1110	262 voxels Supramarginal Gyrus, posterior division Left	0.005798	0.000012	↑
					255 voxels Cingulate Gyrus, anterior division
					210 voxels Middle Temporal Gyrus, posterior division Left
					206 voxels Superior Frontal Gyrus Right
					171 voxels(Angular Gyrus Left
					168 voxels Middle Frontal Gyrus Right
					161 voxels Middle Temporal Gyrus, anterior division Left
					157 voxels Temporal Pole Left
					153 voxels Precentral Gyrus Right
					136 voxels Paracingulate Gyrus Left
Right Hippocampus (H-O)	38	-2	44	914	206 voxels Superior Frontal Gyrus Right	0.009405	0.000040	↓
					168 voxels Middle Frontal Gyrus Right
					153 voxels Precentral Gyrus Right
					73 voxels Postcentral Gyrus Right
Right Hippocampus (H-O)	-52	2	-38	795	210 voxels Middle Temporal Gyrus, posterior division Left	0.013707	0.000088	↑
					161 Middle Temporal Gyrus, anterior division Left
					157 Temporal Pole Left
Right Hippocampus (H-O)	-62	-46	16	593	262 voxels Supramarginal Gyrus, posterior division Left	0.044979	0.000384	↑
					171 voxels Angular Gyrus Left
Right Superior Temporal Gyrus post (H-O)	-36	-98	4	1805	586 voxels Occipital Pole Left	0.000371	0.000001	↓
					357 voxels Lateral Occipital Cortex, superoir division Left
					351 voxels Lateral Occipital Cortex, inferior division Left
					250 voxels Lingual Gyrus Right
					144 voxels Occipital Fusiform Gyrus Right
					111 voxels Lateral Occipital Cortex, inferior division Right
Right Superior Temporal Gyrus post (H-O)	32	82	2	804	250 voxels Lingual Gyrus Right	0.027070	0.000115	↓
					144 voxels Occipital Fusiform Gyrus Right
					111 voxels Lateral Occipital Cortex, inferior division Right
Left Middle Temporal Gyrus ant (H-O)	24	-30	2	1617	341 voxels Hippocampus Right	0.000653	0.000002	↑
					124 voxels Parahippocampal Gyrus, anterior division Right
					114 voxels Middle Temporal Gyrus, anterior division Right
Left Middle Temporal Gyrus ant (H-O)	-4	-2	54	828	268 voxels Superior Frontal Gyrus Right	0.017183	0.000098	↓
					206 voxels Supplementary Motor Cortex Right
Left Middle Temporal Gyrus ant (H-O)	-34	-44	-6	792	265 voxels Hippocampus Left	0.017183	0.000125	↑
					101 voxels Thalamus Left
Left Middle Temporal Gyrus ant (H-O)	46	-68	-36	709	484 voxels Cerebelum Crus1 Right	0.022660	0.000219	↓
					163 voxels Cerebelum 6 Right
Left Middle Temporal Gyrus ant (H-O)	-46	-72	26	677	541 voxels Lateral Occipital Cortex, superoir division Left	0.022730	0.000275	↑
