# Supplementary material for: Peculiarities of Functional Connectivity—including Cross-Modal Patterns—in Professional Karate Athletes: Correlations with Cognitive and Motor Performances
Source: Hindawi journal article supplement (doi:10.1155/2019/6807978), 2019-06-26
Supplement: f1 [file 6807978.f1.zip › Table S2.xlsx]

## Sheet: Sheet1
Anatomical Region (ROI)	Clusters			k	Cluster distribution	cluster p-FDR	cluster p-unc	Increase/Decrease Connectivity
	x	y	z
Right Superior Parietal Lobe (H-O)	12	-60	-16	10346		0.000102	0.000000	↑
					1606 voxels Occipital Pole Left
					1455 voxelsOccipital Pole Right
					688 voxels Lateral Occipital Cortex, inferior division Right
					565 voxels Lingual Gyrus Right
					496 voxels Occipital Fusiform Gyrus Left
					484 voxels Lingual Gyrus Left
					405 voxels Cerebelum 6 Right
					396 voxelsOccipital Fusiform Gyrus Right
					389 voxels Lateral Occipital Cortex, inferior division Left
					361 voxelsPrecuneous Cortex
					321 voxels Lateral Occipital Cortex, superoir division Left
					286 voxels Cerebelum 4 5 Right
					270 voxels Cerebelum 6 Left
					255 voxels Lateral Occipital Cortex, superoir division Right
					244 voxelsCerebelum Crus1 Right
					214 voxelsVermis 6
					134 voxelsCerebelum Crus2 Left
					120 voxels Vermis 4 5
					113 voxels Temporal Occipital Fusiform Cortex Left
Right Superior Parietal Lobe (H-O)	54	2	34	1239	810 voxels Precentral Gyrus Right	0.003592	0.000015	↑
					328 voxels Postcentral Gyrus Right
Right Superior Parietal Lobe (H-O)	-48	-18	6	1078	225 voxels Postcentral Gyrus Left	0.005419	0.000033	↑
					187 voxels Precentral Gyrus Left
					147 voxels Central Opercular Cortex Left
					142 voxels Heschl's Gyrus Left
Right Superior Parietal Lobe (H-O)	12	-4	44	711	223 voxels Supplementary Motor Cortex Right	0.035252	0.000290	↑
Left Occipital Pole (H-O)	24	-52	72	1585	539 voxels Superior Parietal Lobule Right	0.001087	0.000002	↑
					377 voxels Postcentral Gyrus Right
					325 voxels Postcentral Gyrus Left
					295 voxels Precentral Gyrus Right
					190 voxels Planum Temporale Right
					145 voxels Central Opercular Cortex Right
					134 voxels Superior Parietal Lobule Left
					134 voxels Parietal Operculum Cortex Right
					104 voxels Insular Cortex Right
Left Occipital Pole (H-O)	24	-14	20	1097	190 voxels Planum Temporale Right	0.005348	0.000021	↑
					145 voxels Central Opercular Cortex Right
					134 voxels Parietal Operculum Cortex Right
					104 voxels Insular Cortex Right
Left Occipital Pole (H-O)	-22	-36	52	757	325 voxels Postcentral Gyrus Left	0.026865	0.000157	↑
					134 voxels Superior Parietal Lobule Left
Right Occipital Pole (H-O)	44	0	56	9274	1010 voxels Postcentral Gyrus Left	0.000106	0.000000	↑
					934 voxels Postcentral Gyrus Right
					860 voxels Precentral Gyrus Right
					777 voxels Superior Parietal Lobule Right
					751 voxels Lateral Occipital Cortex, superoir division Left
					729 voxels Precuneous Cortex
					517 voxels Precentral Gyrus Left
					472 voxels Superior Parietal Lobule Left)
					424 voxels Lateral Occipital Cortex, superoir division Right
					388 voxels Frontal Pole Right
					354 voxels Supramarginal Gyrus, anterior division Left
					317 voxels Superior Frontal Gyrus Right
					284 voxels Superior Frontal Gyrus Left
					280 voxels Supplementary Motor Cortex Right
					264 voxels Middle Frontal Gyrus Right
					223 voxels Cerebelum Crus1 Left
					218 voxels Cerebelum 6 Left
					212 voxels Cuneal Cortex Left
					204 voxels Cuneal Cortex Right
					139 voxels Cingulate Gyrus, anterior division
					129 voxels Supplementary Motor Cortex Left
Right Occipital Pole (H-O)	-10	-78	30	1247	511 voxels Lateral Occipital Cortex, superoir division Left	0.002675	0.000011	↑
					212 voxels Cuneal Cortex Left
					170 voxels Precuneous Cortex
Right Occipital Pole (H-O)	32	38	48	676	388 voxels Frontal Pole Right	0.049338	0.000293	↑
					199 voxels Middle Frontal Gyrus Right
Right Occipital Pole (H-O)	-18	-60	-22	635	223 voxels Cerebelum Crus1 Left	0.049388	0.000391	↑
					218 voxels Cerebelum 6 Left
