# Supplementary material for: Peculiarities of Functional Connectivity—including Cross-Modal Patterns—in Professional Karate Athletes: Correlations with Cognitive and Motor Performances
Source: Hindawi journal article supplement (doi:10.1155/2019/6807978), 2019-06-26
Supplement: f1 [file 6807978.f1.zip › Table S3.xlsx]

## Sheet: Sheet1
Anatomical Region (ROI)	Clusters			k	Cluster distribution	cluster p-FDR	cluster p-unc	Increase/Decrease Connectivity
	x	y	z
Left Thalamus (Sh PS)	24	-96	32	4557	1533 voxels Lateral Occipital Cortex, superoir division Left	0.000101	0.000000	↓
					1387 voxels Precuneous Cortex
					956 voxels Superior Frontal Gyrus Left
					864 voxels Middle Frontal Gyrus Left
					854 voxels Lateral Occipital Cortex, superoir division Right
					797 voxels Lateral Occipital Cortex, inferior division Left
					728 voxels Occipital Pole Right
					695 voxels Occipital Pole Left
					599 voxels Lateral Occipital Cortex, inferior division Right
					557 voxels Cingulate Gyrus, posterior division
					431 voxels Frontal Pole Right
					415 voxels Frontal Pole Left
					340 voxels Paracingulate Gyrus Left
					278 voxels Angular Gyrus Left
					173 voxels Occipital Fusiform Gyrus Left
					120 voxels Angular Gyrus Right
Left Thalamus (Sh PS)	-12	52	42	3270	953 voxels Superior Frontal Gyrus Left	0.000101	0.000000	↑
					864 voxels Middle Frontal Gyrus Left
					408 voxels Frontal Pole Left
					340 voxels Paracingulate Gyrus Left
Left Thalamus (Sh PS)	-4	-72	30	2141	1387 voxels Precuneous Cortex	0.000237	0.000001	↑
					557 voxels Cingulate Gyrus, posterior division
Left Thalamus (Sh PS)	-44	-62	32	1792	1293 voxels Lateral Occipital Cortex, superoir division Left	0.000438	0.000003	↑
					278 voxels Angular Gyrus Left
Left Thalamus (Sh PS)	36	-58	40	944	728 voxels Lateral Occipital Cortex, superoir division Right	0.009434	0.000093	↑
					120 voxels Angular Gyrus Right
Left Thalamus (Sh PS)	6	56	30	674	431 voxels Frontal Pole Right	0.034545	0.000407	↑
Left Inferior Frontal (Sh BG)	52	-72	-14	931	436 voxels Lateral Occipital Cortex, inferior division Left	0.037840	0.000096	↑
					306 voxels Lateral Occipital Cortex, inferior division Right
					222 voxels Precuneous Cortex
					202 voxels Middle Temporal Gyrus, temporooccipital part Right
					176 voxels Inferior Temporal Gyrus, temporooccipital part Right
					126 voxels Inferior Temporal Gyrus, temporooccipital part Left
					121 voxels Lingual Gyrus Left
					107 voxels Cuneal Cortex Left
Left Inferior Frontal (Sh BG)	-10	-50	30	844	222 voxels Precuneous Cortex	0.037840	0.000151	↓
					121 voxels Lingual Gyrus Left
					107 voxels Cuneal Cortex Left
Left Inferior Frontal (Sh BG)	-50	-70	-4	729	436 voxels Lateral Occipital Cortex, inferior division Left	0.047883	0.000286	↑
					126 voxels Inferior Temporal Gyrus, temporooccipital part Left
Left Middle/Superior Frontal (Sh LECN)	-2	-24	34	1022	387 voxels Precuneous Cortex	0.046606	0.000091	↓
					368 voxels Cingulate Gyrus, posterior division
Left Superior/Inferior Parietal (Sh LECN)	No suprathreshold voxels
Left Middle/Superior Occipital (Sh hVIS)	No suprathreshold voxels
