# Supplementary material for: Peculiarities of Functional Connectivity—including Cross-Modal Patterns—in Professional Karate Athletes: Correlations with Cognitive and Motor Performances
Source: Hindawi journal article supplement (doi:10.1155/2019/6807978), 2019-06-26
Supplement: f1 [file 6807978.f1.zip › Table S4.xlsx]

## Sheet: Sheet1
Anatomical Region (ROI)	Clusters			k	Cluster distribution	cluster p-FDR	cluster p-unc	Increase/Decrease Connectivity
	x	y	z
Left Cerebellum Lobule VIII VIIb (Sh VS)	-34	52	10	2727	1463 voxels Precuneous Cortex	0.000363	0.000001	↑
					874 voxels Frontal Pole Left
					518 voxels Middle Temporal Gyrus, posterior division Left
					403 voxels Angular Gyrus Left
					384 voxels Temporal Pole Right
					370 voxels Superior Frontal Gyrus Right
					367 voxels Superior Frontal Gyrus Left
					334 voxels Temporal Pole Left
					276 voxels Cingulate Gyrus, posterior division
					267 voxels Paracingulate Gyrus Right
					187 voxels Middle Temporal Gyrus, anterior division Left
					178 voxels Lateral Occipital Cortex, superoir division Left
					163 voxels Frontal Pole Right
					136 voxels Supramarginal Gyrus, posterior division Left
					125 voxels Paracingulate Gyrus Left
					121 voxels Middle Temporal Gyrus, posterior division Right
					112 voxels Inferior Temporal Gyrus, posterior division Left
Left Cerebellum Lobule VIII VIIb (Sh VS)	8	-60	40	2015	1463 voxels Precuneous Cortex	0.000536	0.000003	↑
					276 voxels Cingulate Gyrus, posterior division
Left Cerebellum Lobule VIII VIIb (Sh VS)	-48	-12	-30	1949	518 voxels Middle Temporal Gyrus, posterior division Left	0.000536	0.000003	↑
					334 voxels Temporal Pole Left
					187 voxels Middle Temporal Gyrus, anterior division Left
					112 voxels Inferior Temporal Gyrus, posterior division Left
Left Cerebellum Lobule VIII VIIb (Sh VS)	40	18	-36	1111	384 voxels Temporal Pole Right	0.006812	0.000059	↑
					121 voxels Middle Temporal Gyrus, posterior division Right
Left Cerebellum Lobule VIII VIIb (Sh VS)	-54	-56	30	831	403 voxels Angular Gyrus Left	0.020074	0.000217	↑
					178 voxels Lateral Occipital Cortex, superoir division Left
					136 voxels Supramarginal Gyrus, posterior division Left
Right Supramarginal Gyrus (Sh LANG)	-18	0	16	1324	107 voxels Caudate Left	0.015045	0.000036	↑
Left Supramarginal/Angular Gyrus (Sh LANG)	No suprathreshold voxels
