# Supplementary figures and images for: Peculiarities of Functional Connectivity—including Cross-Modal Patterns—in Professional Karate Athletes: Correlations with Cognitive and Motor Performances
Source: Hindawi journal article supplement (doi:10.1155/2019/6807978), 2019-06-26

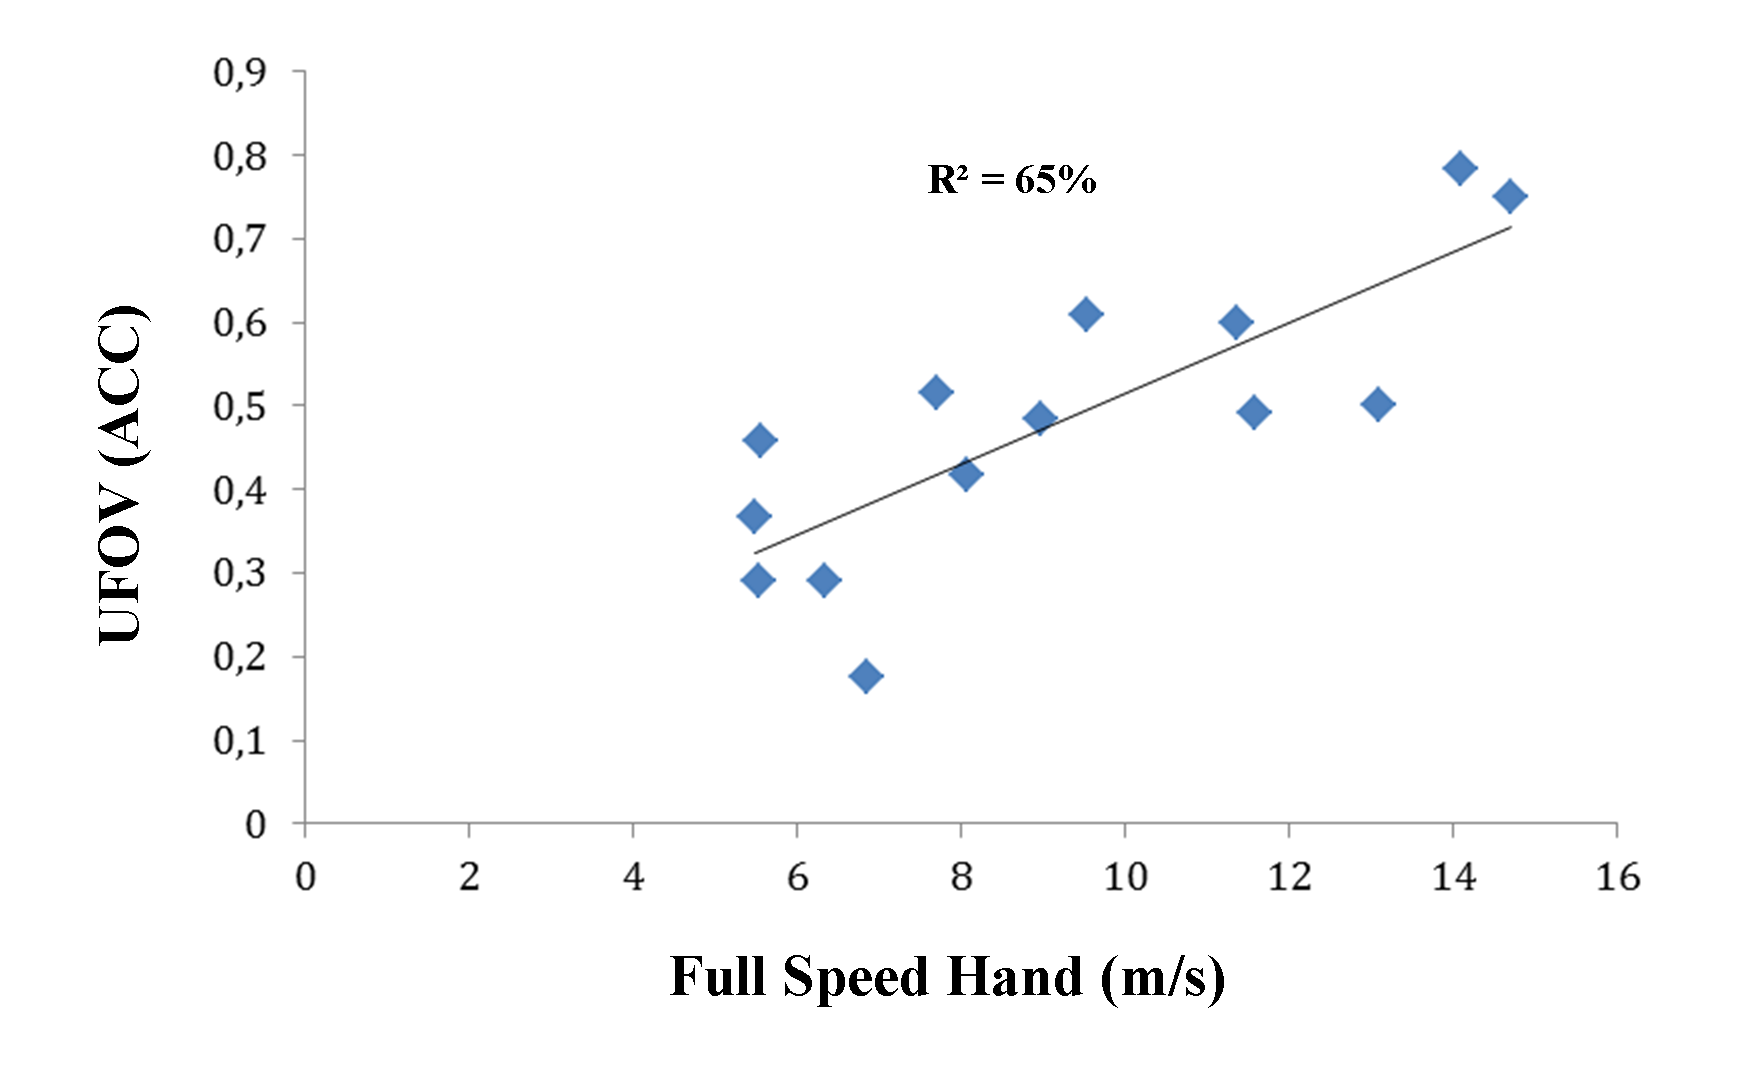

Supplement: f1 [file 6807978.f1.zip › S1.png]

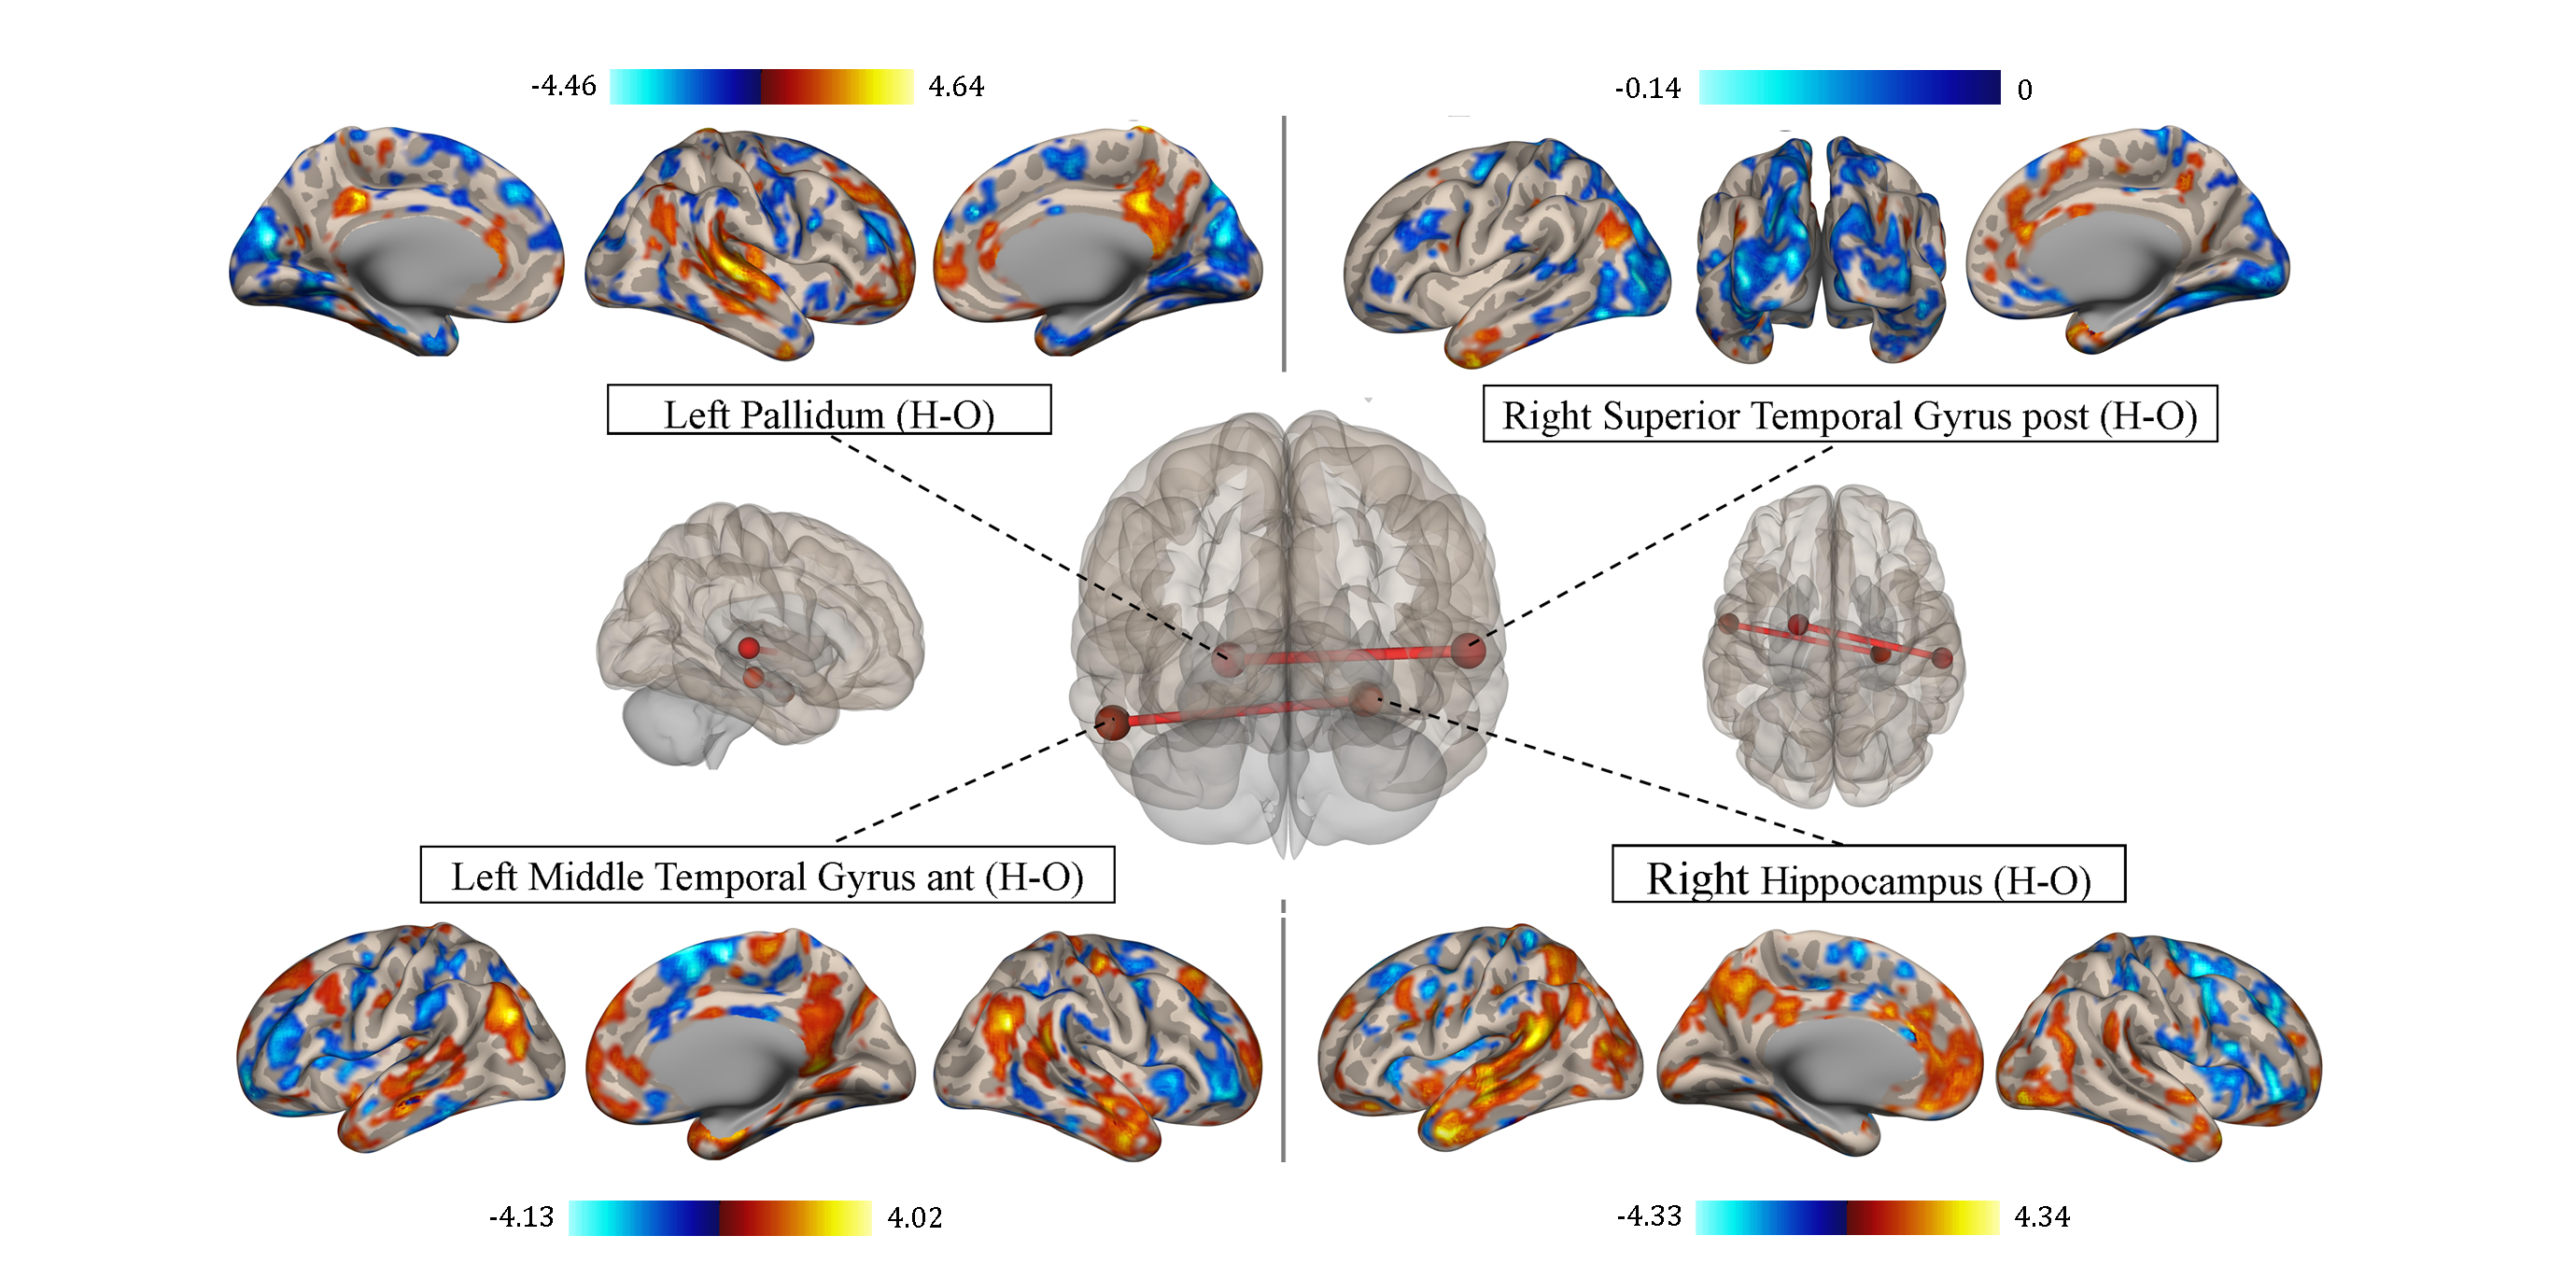

Supplement: f1 [file 6807978.f1.zip › S2.png]

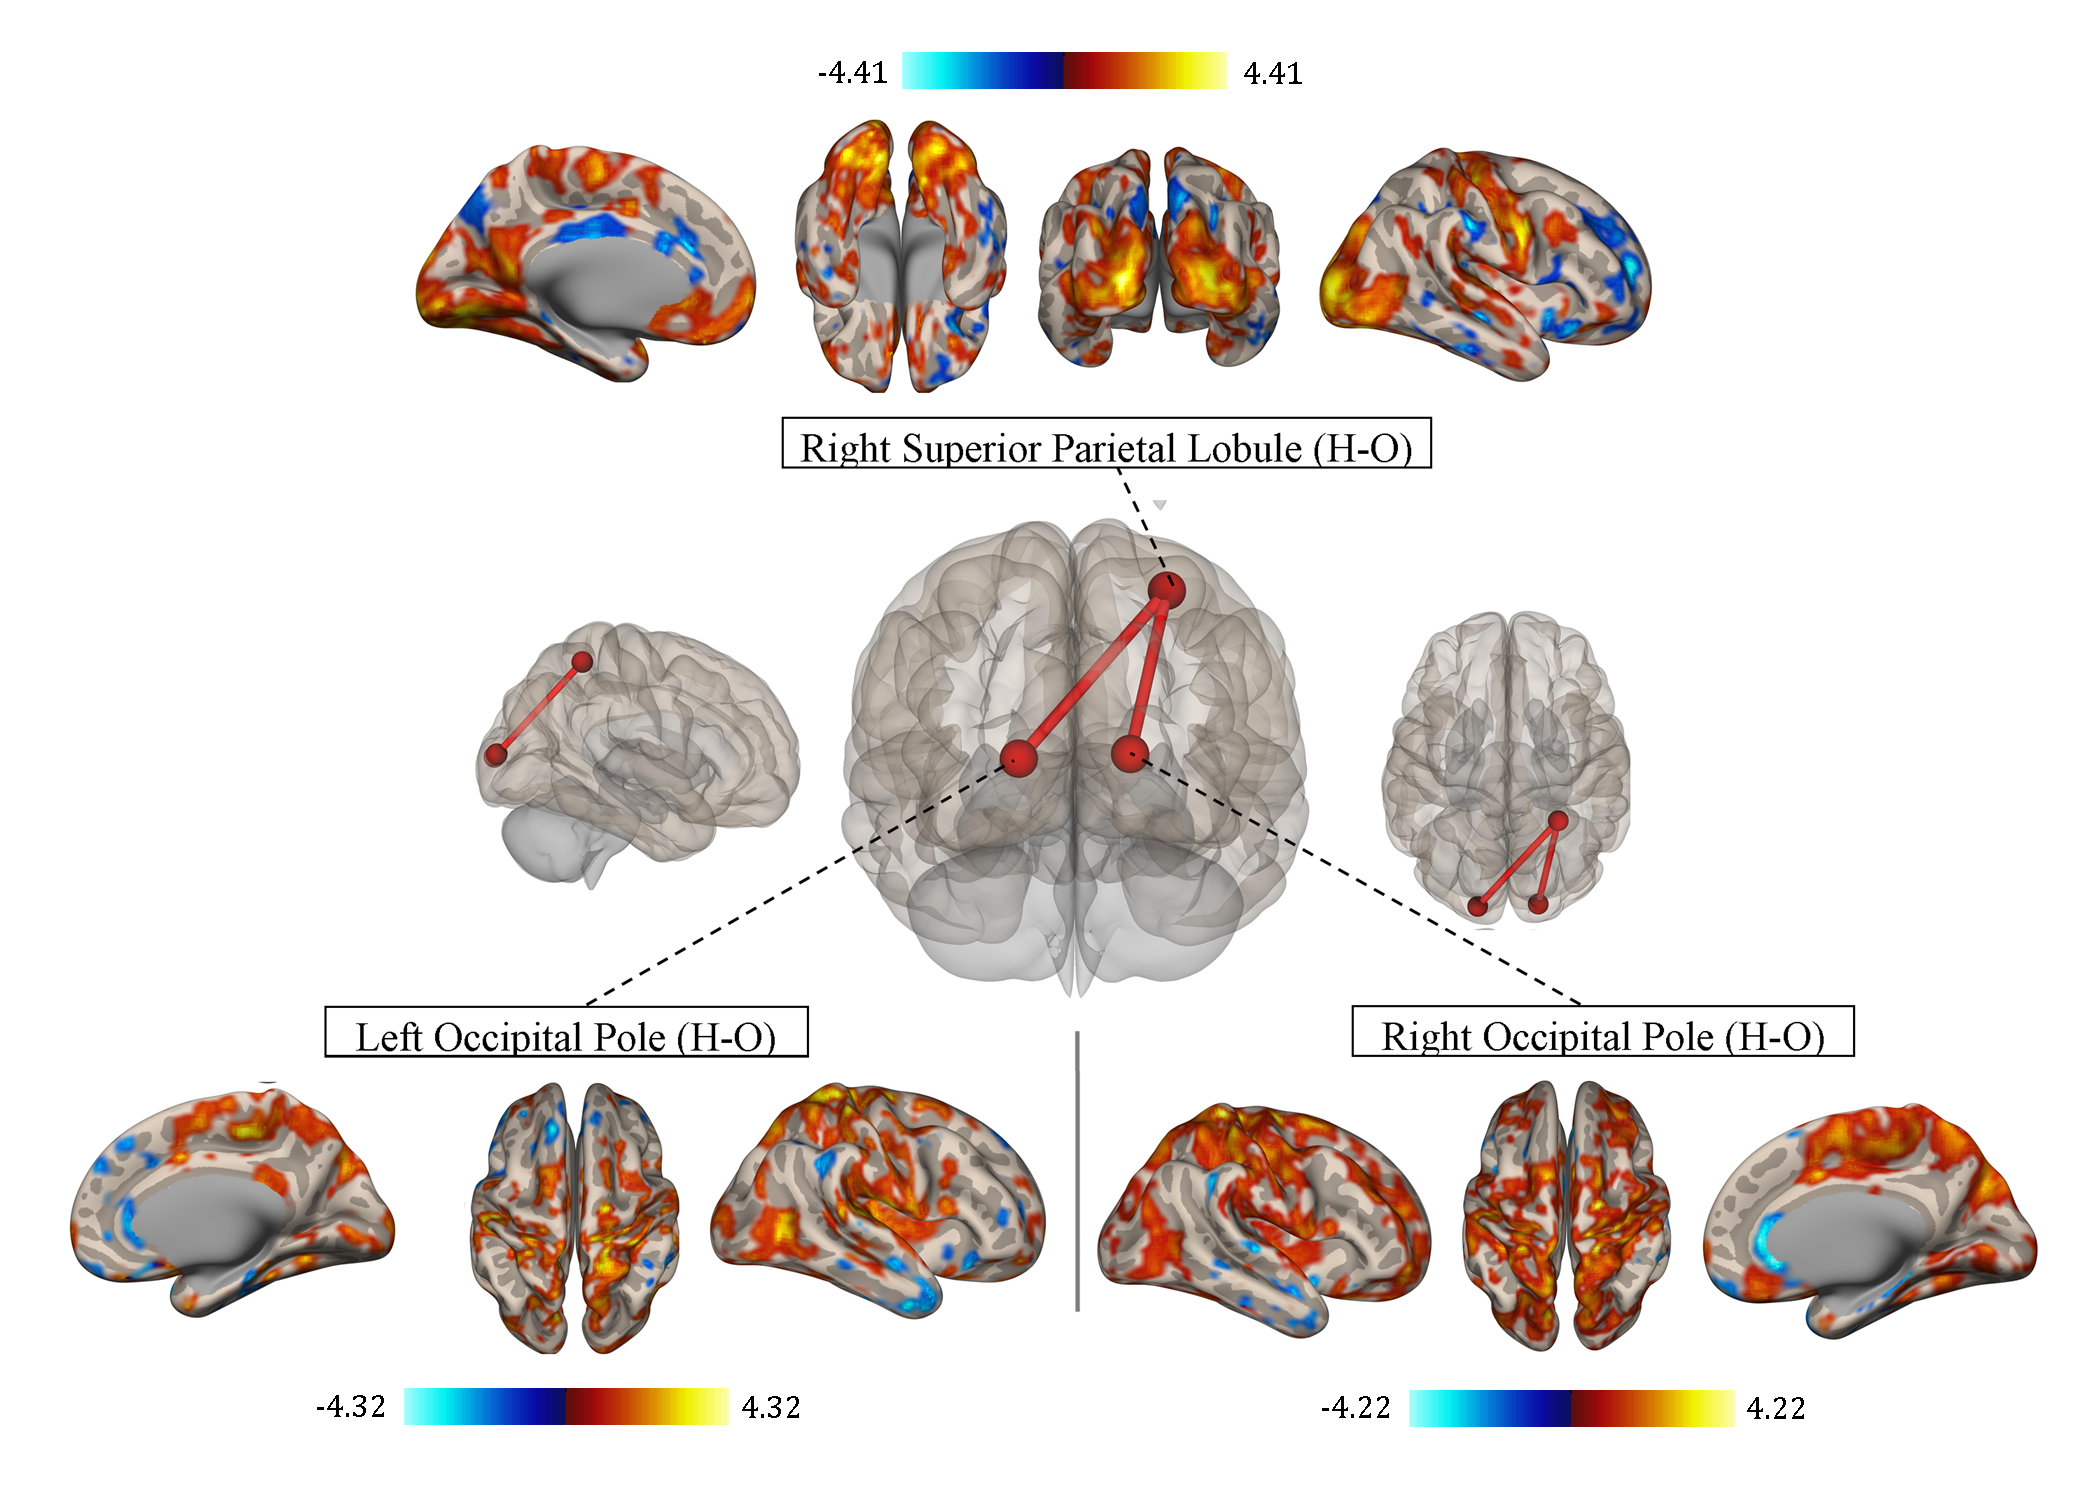

Supplement: f1 [file 6807978.f1.zip › S3.png]

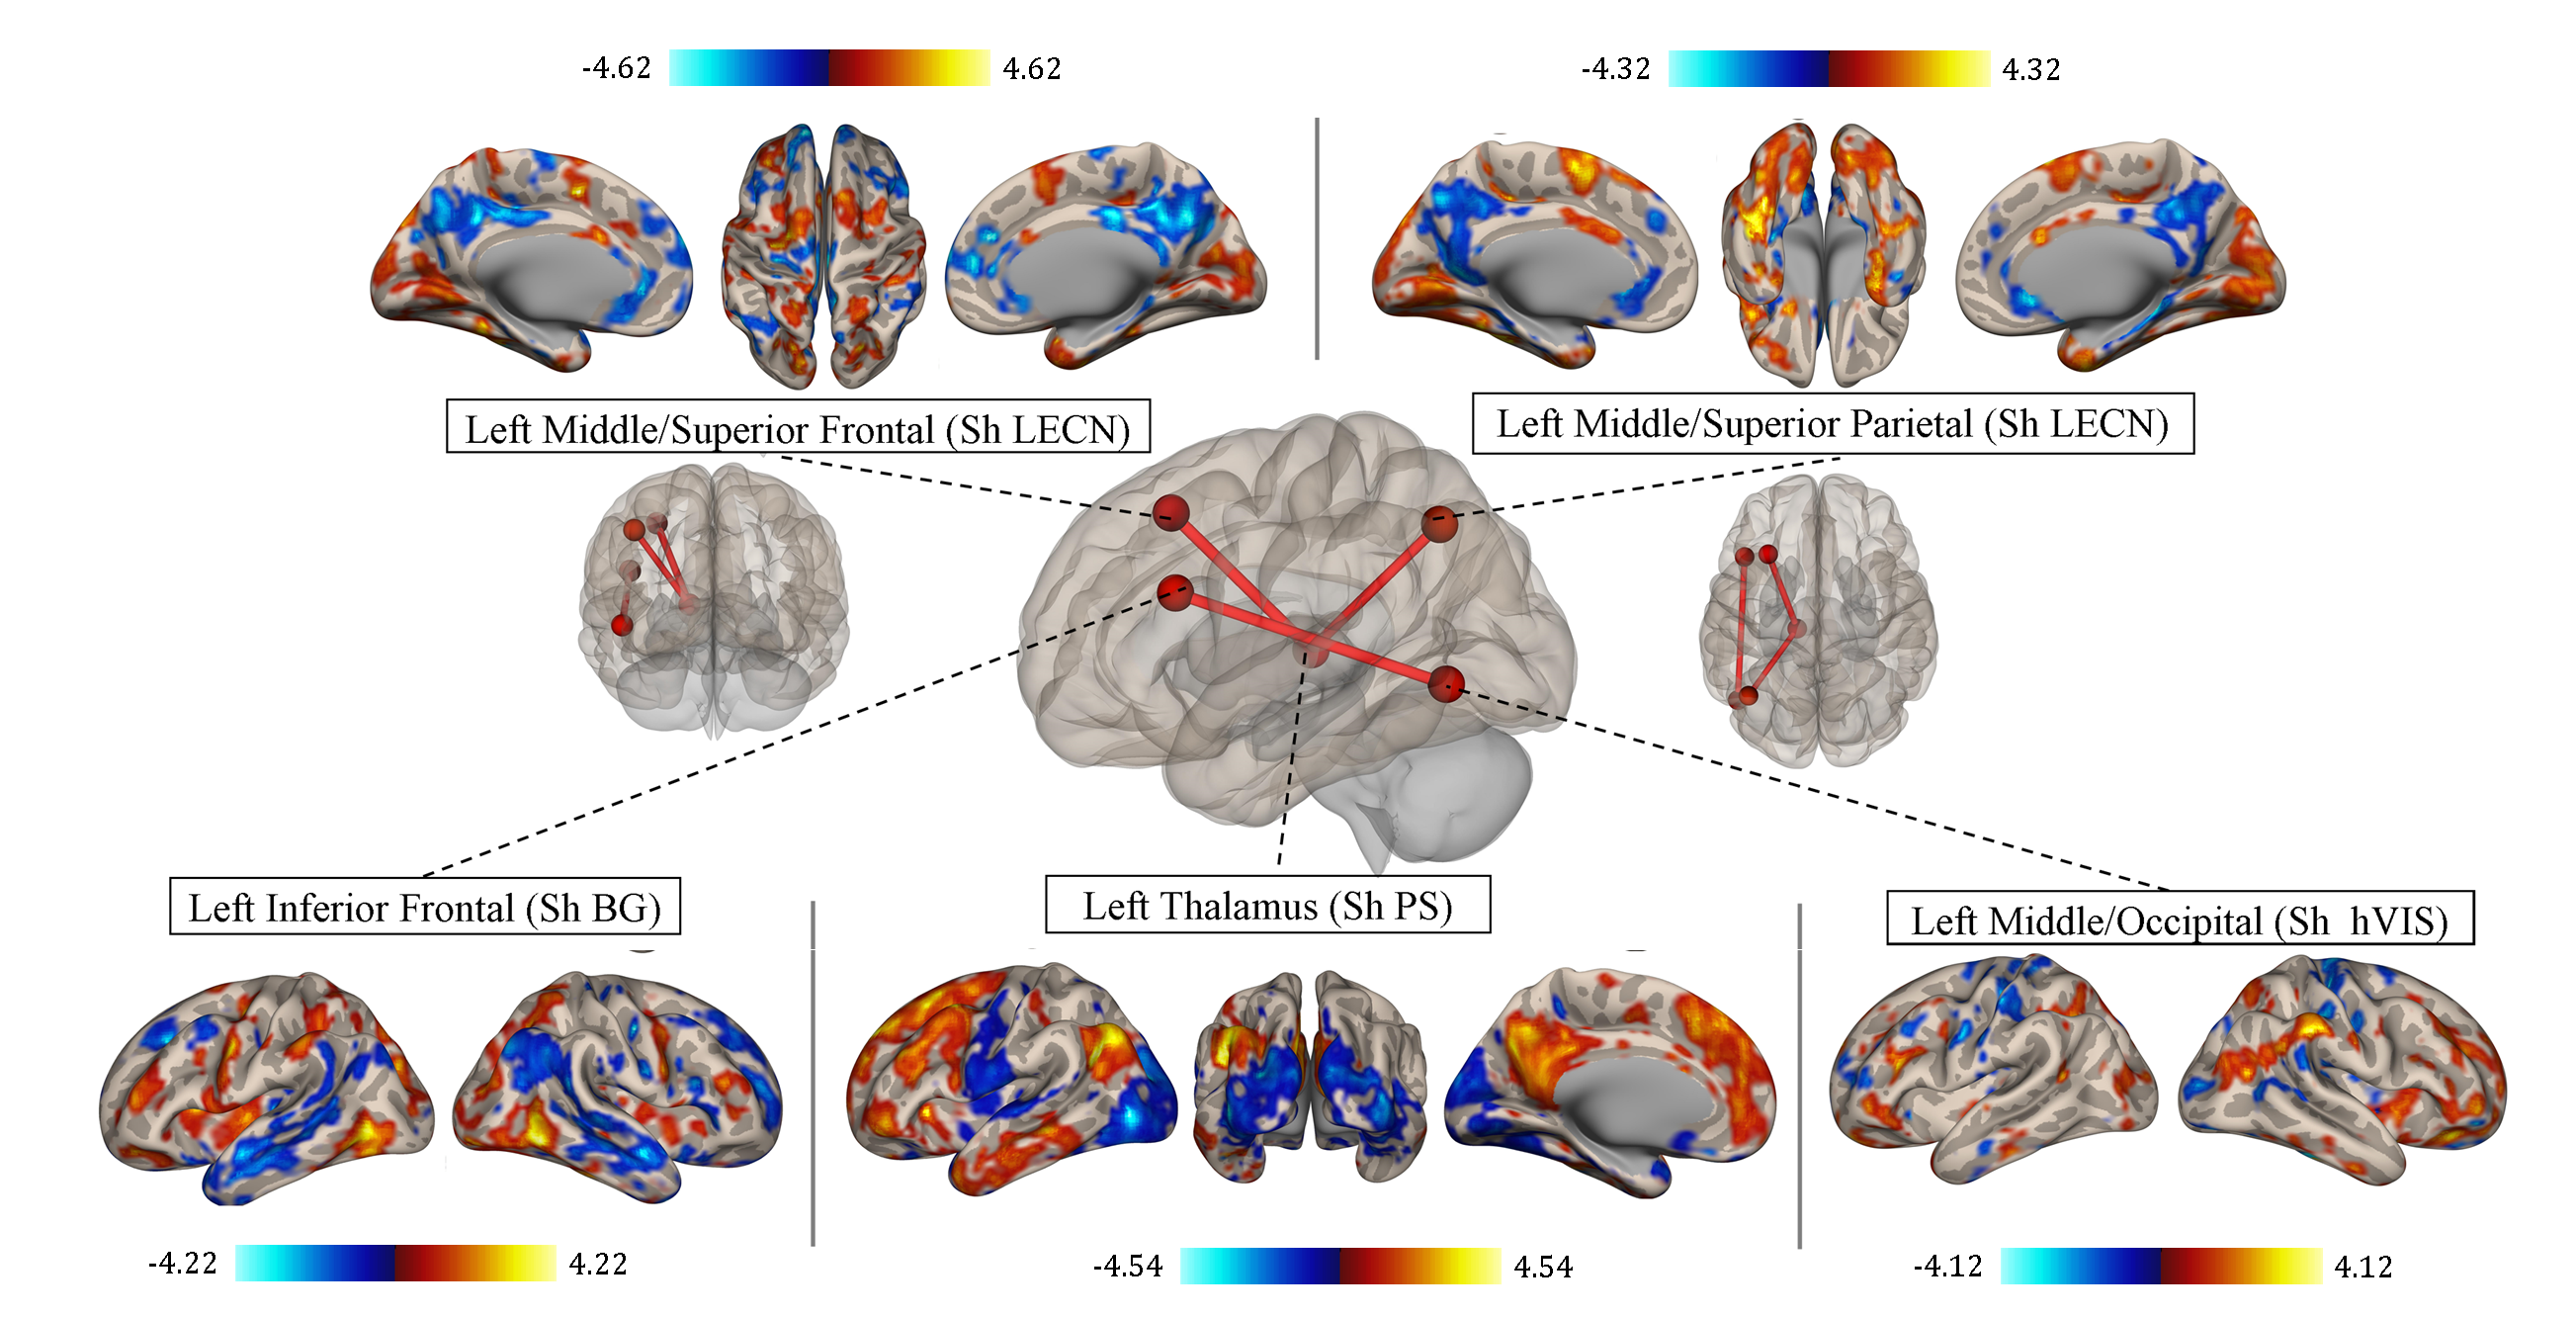

Supplement: f1 [file 6807978.f1.zip › S4.png]

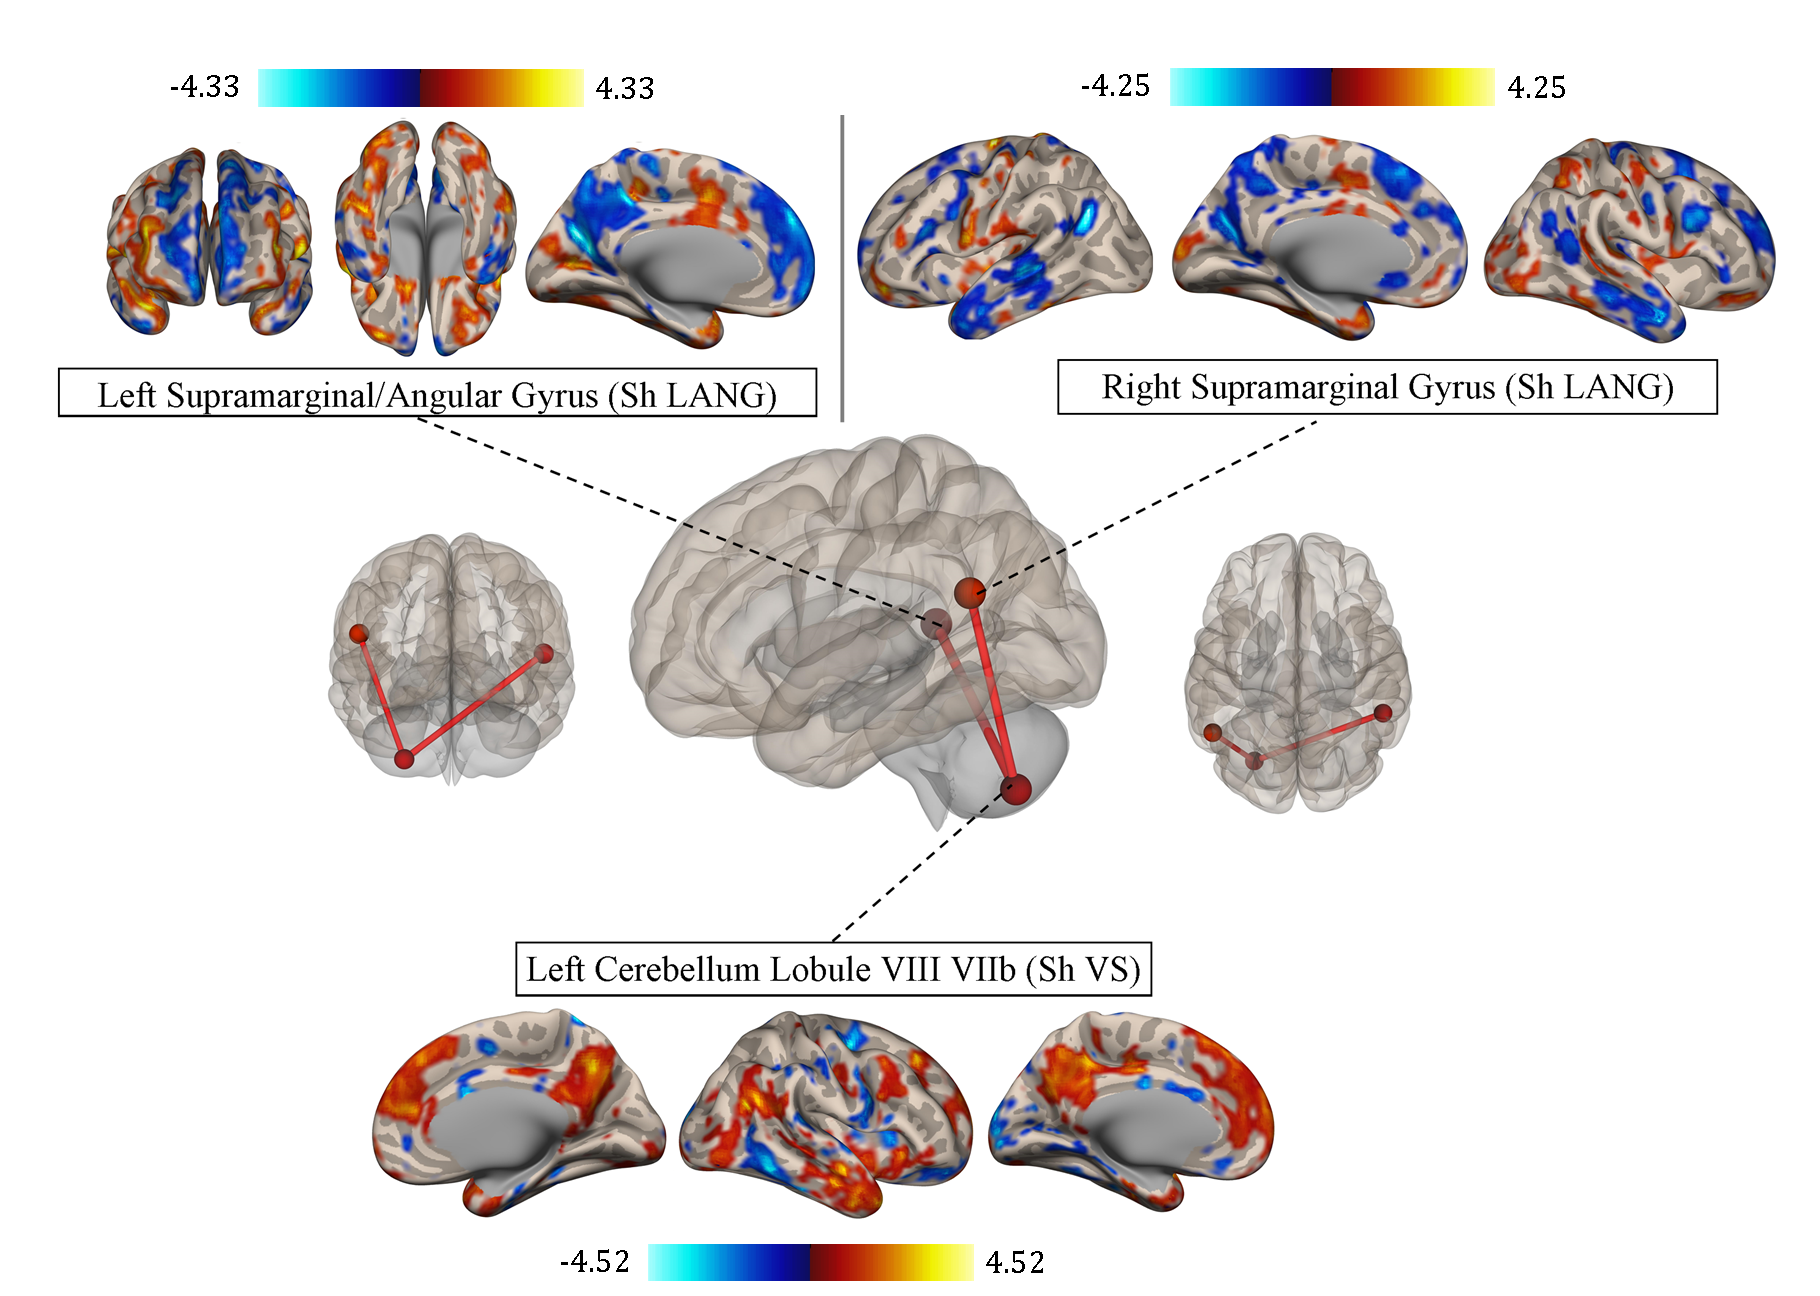

Supplement: f1 [file 6807978.f1.zip › S5.png]
